1 **Influence of pump laser fluence on ultrafast structural changes in myoglobin**

2 Thomas R.M. Barends<sup>1\*</sup>, Swarnendu Bhattacharyya<sup>2#</sup>, Alexander Gorel<sup>1#</sup>, Giorgio Schiro<sup>3</sup>,  
3 Camila Bacellar<sup>4</sup>, Claudio Cirelli<sup>4</sup>, Jacques-Philippe Colletier<sup>3</sup>, Lutz Foucar<sup>1</sup>, Marie Luise  
4 Grünbein<sup>1</sup>, Elisabeth Hartmann<sup>1</sup>, Mario Hilpert<sup>1</sup>, Philip J.M. Johnson<sup>4</sup>, Marco Kloos<sup>5</sup>, Gregor  
5 Knopp<sup>4</sup>, Bogdan Marekha<sup>6</sup>, Karol Nass<sup>4</sup>, Gabriela Nass Kovacs<sup>1</sup>, Dmitry Ozerov<sup>4</sup>, Miriam  
6 Stricker<sup>7</sup>, Martin Weik<sup>3</sup>, R. Bruce Doak<sup>1</sup>, Robert L. Shoeman<sup>1</sup>, Christopher J. Milne<sup>4</sup>, Miquel  
7 Huix-Rotllant<sup>2\*</sup>, Marco Cammarata<sup>8</sup>, Ilme Schlichting<sup>1\*</sup>

8

9 <sup>1</sup> Max Planck Institute for Medical Research, Heidelberg, Germany

10 <sup>2</sup> Institut de Chimie Radicalaire, CNRS, Aix Marseille Univ, Marseille, France

11 <sup>3</sup> Institut de Biologie Structurale, Grenoble, France

12 <sup>4</sup> Paul Scherrer Institute, Villigen, Switzerland

13 <sup>5</sup> European XFEL GmbH, Schenefeld, Germany

14 <sup>6</sup> Laboratoire de Chimie, ENS de Lyon, Lyon, France

15 <sup>7</sup> Department of Statistics, University of Oxford, Oxford, UK

16 <sup>8</sup> ESRF, Grenoble, France

17 \* Thomas.Barends@mpimf-heidelberg.mpg.de, miquel.huixrotllant@univ-amu.fr,

18 ilme.schlichting@mpimf-heidelberg.mpg.de

19

20 # contributed equally

21

22

23

24 **Summary**

25 **High-intensity femtosecond pulses from an X-ray free-electron laser enable pump probe**  
26 **experiments for investigating electronic and nuclear changes during light-induced**  
27 **reactions. On time scales ranging from femtoseconds to milliseconds and for a variety of**  
28 **biological systems, time-resolved serial femtosecond crystallography (TR-SFX) has**  
29 **provided detailed structural data for light-induced isomerization, breakage or formation of**  
30 **chemical bonds and electron transfer<sup>1</sup>. However, all ultra-fast TR-SFX studies to date have**  
31 **employed such high pump laser energies that several photons were nominally absorbed per**  
32 **chromophore<sup>2-14</sup>. As multiphoton absorption may force the protein response into**  
33 **nonphysiological pathways, it is of great concern<sup>15</sup> whether this experimental approach<sup>16</sup>**  
34 **allows valid inferences to be drawn vis-à-vis biologically relevant single-photon-induced**  
35 **reactions<sup>17</sup>. Here we describe ultrafast pump-probe SFX experiments on photodissociation**  
36 **of carboxymyoglobin, showing that different pump laser fluences yield markedly different**  
37 **results. In particular, the dynamics of structural changes and observed indicators of the**  
38 **mechanistically important coherent oscillations of the Fe-CO bond distance (predicted by**  
39 **recent quantum wavepacket dynamics<sup>15</sup>) are seen to depend strongly on pump laser**  
40 **energy. Our results confirm both the feasibility and necessity of performing TR-SFX pump**  
41 **probe experiments in the linear photoexcitation regime. We consider this to be a starting**  
42 **point for reassessing design and interpretation of ultrafast TR-SFX pump probe**  
43 **experiments<sup>16</sup> such that biologically relevant insight emerges.**

44

45

46 **MAIN**

47 Light is an important environmental variable and organisms have evolved a variety of systems to  
48 sense it, exploit it, avoid it and deal with its damaging effects for example on DNA. Photosensory  
49 proteins contain a variety of light-absorbing chromophores with conjugated double bonds. Critical  
50 steps upon photon absorption include formation of a photoexcited chromophore, coupled  
51 electronically and vibrationally to the protein matrix, followed by transitions through a series of  
52 reaction intermediates. Elucidation of these events is not only of interest from a basic scientific  
53 point of view, but also of practical significance. Many photosensory proteins are either medically  
54 relevant (visual rhodopsins, melanopsins and cryptochromes), or useful tools for cell biology  
55 (imaging via fluorescent proteins, functional manipulations in optogenetics), or important for  
56 agriculture (photosystems and phytochromes). Of great interest to a very broad and large  
57 community is understanding of the relevant chemical mechanisms (including molecular  
58 determinants of quantum yields), the different photophysical and photochemical pathways and the  
59 origin of structural changes that accompany and effect biological function.

60 Until recently, experimental investigations of ultrafast events following photoexcitation were  
61 limited to various optical spectroscopies. Such studies provide deep insight into electronic and  
62 vibrational changes during the reaction but only restricted structural information, thereby limiting  
63 mechanistic insight. This shortcoming has been alleviated with the advent of X-ray free-electron  
64 lasers (XFELs), which provide highly intense short X-ray pulses that enable ultrafast time-resolved  
65 serial femtosecond crystallography (TR-SFX)<sup>1</sup>. Importantly, SFX allows the use of microcrystals.  
66 The high chromophore concentration in crystals results in high optical densities, which can be  
67 countered experimentally only by reducing crystal size. This is obligatory for efficient and well-  
68 defined initiation of photoexcitation reactions.

69 In time-resolved pump-probe SFX experiments, microcrystals are delivered into the XFEL beam  
70 using mostly liquid jets and diffraction data are collected at distinct time-delays following a photo-  
71 exciting pump laser flash. On the sub-ps to ns timescale, this approach has been used to study  
72 isomerization reactions in photoactive yellow protein (PYP)<sup>3</sup>, fluorescent protein<sup>4</sup>, various  
73 rhodopsins<sup>5,6,8,9,11,13</sup> and phytochrome<sup>7</sup>; electron transfer reactions in a photosynthetic reaction  
74 center<sup>10</sup> and photolyase<sup>12</sup>; photocarboxylation<sup>17</sup> and photodissociation<sup>2</sup>. In all cases, a very high  
75 pump laser fluence was used to maximize the light-induced difference electron density signal,<sup>16</sup>.  
76 As a result - when using the same cross sections for ground state and excited state absorption -  
77 significantly more than one photon is nominally absorbed per chromophore. Such excitation  
78 conditions differ markedly from those used in spectroscopic investigations, which are performed  
79 in the linear photoexcitation regime with generally much less than 0.5 photon/chromophore.  
80 Multiphoton artefacts are then avoided and only the biologically relevant single-photon reaction is  
81 probed. Consequently there can be considerable doubt as to whether SFX and spectroscopic  
82 measurements actually probe the same reaction, thus questioning the mechanistic relevance of the  
83 SFX results<sup>18</sup>. Nevertheless, the SFX community has failed so far to reach consensus on  
84 appropriate photoexcitation conditions for time-resolved pump probe experiments<sup>16,19</sup>.

85 Photodissociation of carboxymyoglobin (MbCO) is a well-characterized model reaction that has  
86 implications in a wide range of fields, ranging from organometallic chemistry to protein dynamics.  
87 The reaction has been studied by numerous computational and experimental approaches including  
88 TR-SFX<sup>2</sup>, with issues of high photoexcitation power density having been pointed out early on<sup>20,21</sup>.  
89 Here we examine the influence of the laser fluence on structural features of photoexcited MbCO  
90 derived from TR-SFX experiments. We show that the dynamics of structural changes differ and  
91 that indications for coherent oscillations of the Fe-CO bond distance predicted by recent quantum

92 wavepacket dynamics<sup>15</sup> are absent when using high photoexcitation power, which can be explained  
93 by the sequential absorption of two photons as inferred from quantum chemistry.

#### 94 **Pump laser power titration**

95 Power titration is a useful tool to establish the linear photoexcitation regime, namely that regime  
96 in which the magnitude of the response signal – or, in case of crystallographic investigations, the  
97 occupancy – increases linearly as a function of the incident laser energy density. Our first power  
98 titrations employed optical spectroscopy of the MbCO photodissociation reaction as a function of  
99 the power density of the pump laser. To this end, we determined the laser on - laser off difference  
100 absorption spectra (range 550-770 nm) 10 ps after photoexcitation by a 532 nm laser pulse. We  
101 explored different energy densities and pulse durations, specifically, three pulse durations of 80  
102 fs, 230 fs and 430 fs at energy densities ranging from ~1 to 90 mJ/cm<sup>2</sup> in the center of the Gaussian  
103 beam. The results are shown in Extended Data Fig. 1. The photolysis yield shows a clear  
104 dependence on the energy and duration of the pump pulse, with longer pulses being more efficient  
105 (up to ~ 60% for the 430 fs pulse (Extended Data Fig. 1d)). At fluences above ~20 mJ/cm<sup>2</sup>, the  
106 shape of the transient difference spectra deviated from that of the static deoxyMb - MbCO  
107 difference spectrum, with a peak growing at ~650 nm (Extended Data Fig. 1a-c). Although this  
108 peak complicates estimation of the photolysis yield within the high energy density regime, it is  
109 clear that the linear photoexcitation regime lies below 10 mJ/cm<sup>2</sup> (Extended Data Fig. 1d); this  
110 value might differ somewhat when photoexciting a microcrystal suspension.

111 To follow the CO photodissociation process at high temporal and spatial resolution, we performed  
112 a pump-probe TR-SFX experiment on MbCO at SwissFEL, yielding structures to 1.6 Å resolution  
113 (see Methods, Extended Data Table 1). The photolysis yield of Mb.CO microcrystals was  
114 determined using a laser power titration (laser fluence 6-101 mJ/cm<sup>2</sup>, see Extended Data Table 2

115 for excitation parameters) and performing TR-SFX at a 10 ps time delay. Inspection of  $F_{obs}^{light}$  -  
116  $F_{obs}^{dark}$  difference electron density maps shows a clear change of the magnitude of the peaks  
117 associated with bound and photolyzed CO, respectively, and the iron. At higher laser fluence,  
118 changes are also apparent in the protein and the porphyrin ring (Fig. 1a). Considering only the  
119 difference density as in previous TR-SFX studies<sup>7,9,16,22,23</sup>, a laser fluence of 101 mJ/cm<sup>2</sup> appears  
120 preferable. However, further analysis of the data reveals that, for example, the fraction of  
121 photolyzed CO (denoted CO\* henceforth) does not increase linearly at higher fluence, but instead  
122 levels off at ~ 40 % (Fig. 1b). The underlying reason for the 40 % photolysis, despite very high  
123 laser fluence, is that a fraction of the thin plate-shaped MbCO crystals has at least one dimension  
124 that exceeds the 1/e laser penetration depth (~ 7 μm), see Extended Data Fig. 2, Extended Data  
125 Table 2, Supplementary Note 1, Supplementary Fig. 1,2. Our previous investigation, using smaller  
126 crystals, showed 100 % photolysis<sup>2</sup>. Importantly, both observations demonstrate non-linear effects.  
127 In the single photon excitation regime, increasing laser fluence raises the occupancy of the light-  
128 induced state, but does not affect the amplitude or nature of the structural or electronic changes.  
129 In addition to the nonlinear increase in CO\* occupancy with laser fluence (Fig. 1b), the growing  
130 iron-out-of-plane distance (Fig. 1c) is a clear indication for nonlinear effects induced by  
131 multiphoton excitation. Although difference-distance matrix plots do not seem to show significant  
132 structural differences as a function laser fluence (Fig. 1d, Extended Data Fig. 3a), the analysis of  
133 the displacements of Cα atoms from the porphyrin nitrogen atoms indicates that such differences  
134 are indeed present (Extended Data Fig. 3b). Hence the influence of multiphoton excitation on  
135 structural changes it is not always immediately obvious and may demand very careful analysis.  
136

## 137 **Structural changes at different fluences**

138 To check whether the dynamics of the system are affected by the pump laser fluence, we performed  
139 TR-SFX at four different pump laser fluences (2.4, ~5, 23, 101 mJ/cm<sup>2</sup>). These are within, higher  
140 but still within, outside, and far outside the linear excitation regime, respectively. To increase the  
141 relative yield of photoproduct at low laser fluence we used smaller crystals for the 2.4 and ~5  
142 mJ/cm<sup>2</sup> data series (see Extended Data Table 2). The 2.4 mJ/cm<sup>2</sup> data did not yield interpretable  
143 light-induced signal and will not be discussed further. The standard deviation of the time delays  
144 used in the SFX experiment is ~100 fs for the 5, 23 and 101 mJ/cm<sup>2</sup> data, taking into account  
145 timing jitter and the effects of data binning (see Methods section).

146 **Dynamics of MbCO photolysis reaction.** The hallmarks of MbCO photolysis are the observation  
147 of an unbound CO accompanied by changes in the iron's spin states and position. Since CO  
148 photodissociates from the heme iron within 70 fs<sup>24</sup>, and in line with our previous TR-SFX  
149 experiment<sup>2</sup> that showed full occupancy of CO\* within the first time point, we anticipated no  
150 changes in CO\* occupancy with time. Unexpectedly, however, our electron density maps show an  
151 apparent increase of the occupancy of CO\* with time for the 5 and 23 mJ/cm<sup>2</sup> data and, to a lesser  
152 extent of the 101 mJ/cm<sup>2</sup> data (Fig. 2a, see below). Since the data series were collected during two  
153 beamtimes using different crystals, different dark state data and different laser settings (see  
154 Extended Data Table 2), it is very unlikely that this finding is a product of experimental errors.  
155 Instead, the ~ 300 fs time constant of the apparent increase of CO\* occupancy is reminiscent of  
156 the damping constant of a coherent nuclear oscillation of CO\* that was predicted by recent  
157 computational wavepacket analysis<sup>15</sup>. Since the time resolution of our experiment does not allow  
158 the predicted 1 Å amplitude, ~42 fs period oscillations to be resolved, they would manifest  
159 themselves simply as disorder due to distribution of the electron density over a large volume,

160 resulting in an apparently low occupancy. As the oscillation damps, the CO\* position “narrows”  
161 and its apparent occupancy converges to the value observed for the respective laser fluences at ~10  
162 ps (Fig. 1b). Importantly, the predicted CO\* oscillation seems to be suppressed in the high  
163 photoexcitation regime; our previous high fluence study showed maximal CO\* signal within the  
164 first time delay<sup>2</sup>. Similarly, at 101 mJ/cm<sup>2</sup> - and in contrast to 5 and 23 mJ/cm<sup>2</sup> data - we observe  
165 an initial rise to about 2/3 of the final value within the first time delay of our experiment, then the  
166 final 1/3 of the amplitude is reached with a speed comparable to what is observed at 5 and 23  
167 mJ/cm<sup>2</sup> (see Extended Data Fig. 2b).

168 We investigated the molecular basis for this observation by quantum chemical analysis. As  
169 described previously<sup>15</sup>, single photon absorption by MbCO results in wavepacket transfer from the  
170 ground state to the singlet Q state of porphyrin, followed by transfer to the singlet metal-to-ligand  
171 charge-transfer (MLCT) band. The wavepacket undergoes large-amplitude coherent oscillations  
172 in the Fe-CO coordinate on the singlet MLCT band. Importantly, strong Jahn-Teller distortions in  
173 the excited state affords an efficient energy transfer from the porphyrin plane (x,y-polarization) to  
174 the Fe-CO axis (z-polarization), activating dissociative stretching vibrations and thus CO  
175 dissociation<sup>15</sup>. To assess the quality of the quantum chemistry we computed the FeOOP distance  
176 using molecular dynamics in which a sudden dissociation of CO is imposed (see Supplementary  
177 Note 2). Since the results agree well with our SFX observations (Extended Data Fig. 4,  
178 Supplementary Note 2), we have high confidence in the accuracy of the computational approaches.

179 Our calculations show (see Supplementary Note 2) that in the high excitation regime the  
180 dissociation happens via a high-energy singlet state accessed by a sequential absorption of two  
181 photons. The first photon leads to the usual excited singlet Q state from which a second photon  
182 can be absorbed, as indicated by the absorption spectrum of the Q-excited heme-CO system



183 (Extended Data Fig. 4). Analysis of the excitation character of this higher energy singlet state  
184 shows a mixed  $\pi \rightarrow \pi^*$  character of the heme and  $d_{xy} \rightarrow d_{z^2}/d_{yz} \rightarrow d_{z^2}$  character with respect to  
185 the ground state, and therefore is dissociative for the Fe-CO bond (see Extended Data Fig. 4,  
186 Supplementary Note2). The potential energy surface (PES) of the singlet manifold along a relaxed  
187 scan coordinate at different fixed Fe-CO distances (see Methods, Computational Details section)  
188 clearly shows (Supplementary Fig. 3d) that, upon excitation to the dissociative singlet, after a  
189 second absorption from the Q-state, the excited wavepacket experiences a rapid decay towards Fe-  
190 C(O) dissociation. This dissociation is thus driven by the sudden change in electronic structure  
191 induced by photon absorption. Due to the (barrierless) repulsive nature of the potential, no coherent  
192 oscillations of the wavepacket are expected to be observed, in contrast to the single-photon regime,  
193 in which nuclear motions drive the electronic structural changes that lead to dissociation. This  
194 explains the quasi-instantaneous initial increase in apparent occupancy of CO\* in our high fluence  
195 TR-SFX data. In conclusion, the photophysical mechanism of CO dissociation differs for single  
196 and two-photon absorption, respectively, resulting in different structural outcomes. This is in line  
197 with our experimental observations obtained under the respective photoexcitation conditions.

198 **Dynamics of the heme and coordinating His93.** Upon CO photodissociation sequential changes  
199 of the Fe spin state occur, ultimately yielding the high spin (HS) state, and resulting in a movement  
200 of the iron out of the heme plane (FeOOP) as well as motions of surrounding protein moieties.  
201 Here, too, our observations show marked differences between the single- and multiphoton  
202 excitation regimes. The plot of the temporal evolution of the FeOOP distance shows a strong  
203 increase within the time-resolution of our experiment, resulting in  $\sim 50\%$  of the displacement,  
204 followed by a slower phase ( $\tau \sim 400$  fs) as reported previously<sup>2,15,25</sup>, (Fig. 2b). In line with the  
205 observation at a 10 ps time delay, the FeOOP distance is largest for the 101 mJ/cm<sup>2</sup> data. Upon Fe

206 movement, the Fe distances to the nitrogen atoms of the pyrrole ring (Np) and of the proximal  
207 histidine (His93), respectively, increase (Fig. 2c,d). In the 101 mJ/cm<sup>2</sup> data, the initially increasing  
208 Fe-His93 distance decreases again (Fig. 2d), in line with the larger FeOOP displacement (Fig. 2b)  
209 or due to increased vibrational energy redistribution<sup>26</sup>.

210 CO photodissociation also triggers heme breathing motions such as the  $\nu_7$  in-plane vibration of  
211 the porphyrin ring<sup>27</sup> which is predicted to have a distinct amplitude modulation with a period of  
212  $\sim 350$  fs (see Fig. S12 in reference <sup>2</sup>) due to the FeOOP movement. Although we cannot resolve  
213 the  $\nu_7$  in-plane vibration itself ( $\sim 50$  fs period), we do observe a  $\sim 330$  fs oscillation of the meso-  
214 carbon distances to the center of the heme for the 5 mJ/cm<sup>2</sup> photoexcitation energy data (Fig. 2e);  
215 in contrast, the oscillation is hardly visible in the 23 and 101 mJ/cm<sup>2</sup> data.

216 The heme dynamics have been studied by various spectroscopic methods, yielding time-constants  
217 of processes and proposals for the structural basis of the underlying molecular changes. Our  
218 structural data are in line with the interpretation of X-ray absorption spectroscopy data by  
219 Levantino et al<sup>25</sup> proposing changes of the FeOOP distance, the Fe-Np and Fe-His bonds with a  
220 time constant of 70 fs, followed by a smaller change of the FeOOP distance with a time constant  
221 of 400 fs. The latter was suggested to be linked to a movement of the F-helix, which we, however,  
222 observe on a 200-300 fs time-scale depending on laser energy (see below). Our data do not agree  
223 with the structural interpretation by Shelby et al<sup>28</sup>, assigning a small FeOOP displacement to an  
224 80 fs phase, followed by further FeOOP movement and elongation of Fe-Np bonds with a time  
225 constant of 890 fs.

226 **Correlated protein structural changes.** Oscillations of structural features (torsion angles,  
227 distances) of a light-sensitive cofactor and of near-by residues have been reported previously by  
228 TR-SFX<sup>2,6</sup>. These rapidly damped but coherent oscillations are a direct manifestation of the strong

229 coupling of the chromophore and its environment. As in our previous study<sup>2</sup>, we observe  
230 oscillatory dynamics in the heme environment, reflecting coherent motions excited by photo-  
231 dissociation in the heme. In particular, the distal Hist93  $\chi_2$  rotation angle (Extended Data Fig. 6a)  
232 and the heme CMD to Lys42-O distance (Extended Data Fig. 6b) seem to mirror the modulation  
233 of the  $\nu_7$  oscillation (Fig. 3e) as does the Ser92-His93 hydrogen bond length (Extended Data Fig.  
234 6c). The  $\chi_2$  torsion angle of Phe43 (Extended Data Fig 6d) and the heme CHD-Ile99 CD1 distance  
235 (Extended Data Fig. 6e), on the other hand, appears to mirror the heme doming frequency, see also  
236 ref. <sup>2</sup>. Importantly, the temporal development of these angles and distances show marked  
237 differences between the low- and high fluence regimes (Extended Data Fig. 6, 7).

238 Sequence displacement graphs<sup>2,29</sup> —which illustrate the change in distance of the protein main-  
239 chain atoms to the center of the four porphyrin N atoms as a function of the time delay between  
240 the pump and probe pulses— show substantial main-chain changes within 1 ps throughout the  
241 whole protein for all pump laser fluences, but the dynamics differ dramatically (Fig. 3a,b). For  
242 many structural elements, the 5 and 23 mJ/cm<sup>2</sup> data display a temporal evolution over the entire  
243 ultrafast time-series - whereas the 101 mJ/cm<sup>2</sup> data show the essentially the entire displacement  
244 within the first time point, similar our previous observation (Suppl. Fig S5a)<sup>2</sup>. This is particularly  
245 noticeable for the displacement of the proximal His93 from the heme and the coupled motion of  
246 adjacent residues (Fig. 3). Moreover, a strong oscillatory modulation with a frequency of  $\sim 300$  fs  
247 of the His93 displacement and the neighboring residues (Fig. 3c) is clearly visible for the 5 mJ/cm<sup>2</sup>  
248 data only. Thus, the multiphoton effects are not limited to the small-scale motions of a few atoms  
249 but also affect larger-scale correlated protein motions in the entire protein (Extended Data Fig. 8),  
250 including the radius of gyration  $R_g$  (Extended Data Fig. 8). As for other displacements, the  
251 oscillations are pronounced in single photon excitation data (5 mJ/cm<sup>2</sup> fluence).

252 The striking change in dynamics of correlated motions (Fig. 3) with laser fluence is likely due to  
253 the excess energy deposited in the heme and Raman-active modes via multiphoton absorption,  
254 ultimately resulting in heating<sup>21</sup>. At higher temperature, the displacement of the atoms from their  
255 equilibrium position increases so that modes sample more of the anharmonic part of the potential  
256 energy surface. As the rate of energy transfer between modes depends on the nonlinear coupling  
257 between them<sup>30</sup>, they are then in effect more strongly coupled<sup>21</sup>, resulting in faster structural  
258 changes.

259

## 260 **Conclusions**

261 The combination of spectroscopy, TR-SFX and quantum chemistry provides unprecedented  
262 insight into reaction mechanisms and protein dynamics, in particular when the initial ultrafast steps  
263 can be analyzed as fully as only light-triggered reactions allow. An implicit assumption in such  
264 studies is that all three approaches study the same reaction, namely one triggered by the absorption  
265 of a single photon. Hence, photoexcitation conditions matter. Recent quantum dynamics  
266 computations have linked the microscopic origins of ligand photolysis and spin crossover reactions  
267 in photoexcited MbCO to nuclear vibrations and predicted coherent oscillations of the Fe-CO bond  
268 distance<sup>15</sup>. This prediction is consistent with our TR-SRX data showing an apparent increase of  
269 the CO\* occupancy within 0.5 ps after low fluence photoexcitation of MbCO, which mirrors the  
270 damping of the oscillation. In addition to providing first experimental support of this  
271 computational prediction, our low fluence TR-SFX data also allow correlating of spectroscopically  
272 derived information<sup>25,28</sup> with structural data, including the coupling of modes<sup>31</sup>. Although our time  
273 resolution does not allow observation of the predicted coupling of the heme doming mode and the

274 220 cm<sup>-1</sup> (150 fs period) Fe-His mode<sup>31</sup>, we observe the coupling of the FeOOP mode and the in  
275 plane heme breathing mode.

276 High fluence excitation results in multiphoton absorption in MbCO. Our computations show that  
277 sequential two-photon excitation changes the photophysical mechanism by directly populating a  
278 dissociative state, bypassing the wavepacket oscillations, and thus explain the distinct TR-SFX  
279 results under high fluence photoexcitation conditions. Moreover, multiphoton excitation results in  
280 the deposition of excess energy into the system, which opens further relaxation pathways because  
281 the thermal decay channel is strongly coupled to collective modes of protein<sup>21,32</sup>. It was shown  
282 previously<sup>21</sup> that under high excitation conditions MbCO displays power-dependent features with  
283 subpicosecond components attributed to increased anharmonic coupling between the collective  
284 modes of the protein and the increased spatial dispersion of the larger amount of excess energy.  
285 Indeed, we observe faster and larger structural changes when using high fluence photoexcitation  
286 outside the linear regime (Fig. 3a, c). The changes are not purely isotropic but correlate with the  
287 energy flow, for example, the F-helix - which is directly linked to the heme via the proximal His93  
288 - is much more affected than the distal E-helix containing His64 (Fig. 3b). Moreover, the influence  
289 of the photoexcitation regime on oscillatory motions – which are much more pronounced in the  
290 low fluence data (5 mJ/cm<sup>2</sup>) - complicates identification of coherent oscillations that are involved  
291 in mode coupling and ultimately result in the biologically relevant structural changes.

292 Given the widespread and continuing<sup>16</sup> use of overly high photoexcitation energies, it is highly  
293 likely that the light-induced structural changes described for other systems also involve  
294 multiphoton effects but that were presented and interpreted as mechanistically relevant. Likely  
295 symptoms include large structural changes on the ultrafast time-scale<sup>7,10,13</sup>, including those  
296 referred to as protein quakes<sup>5,33</sup> and conformational transitions that are not in line with

297 spectroscopic results<sup>7,34</sup>. Our results call into question recent statements promulgating the value of  
298 TR-SFX pump-probe experiments performed above single-photon excitation thresholds<sup>16</sup>.

299

300

301

302 **Methods**

303 **Sample preparation**

304 Horse heart myoglobin (hhMb) was purchased from Sigma Aldrich (M1882). After dissolving  
305 lyophilized hhMb powder (70 mg/ml) in 0.1 M Tris HCl pH 8.0, the solution was degassed and  
306 then treated with CO. Upon addition of sodium dithionite (12 mg/ml) while constantly bubbling  
307 with CO gas, the color of solution turned to raspberry red. Dithionite was removed by desalting  
308 the protein solution via a PD10 column equilibrated with CO saturated 0.1M Tris HCl pH 8.0.  
309 Subsequently, the MbCO solution was concentrated to ~ 6 mM using centrifugal filters before  
310 freezing in liquid nitrogen for storage.

311 hhMb crystals were grown in seeded batch by adding solid ammonium sulfate to a solution of 60  
312 mg/mM hhMB in 100 mM Tris HCL pH 8.0 until the protein started to precipitate (~3.1 M  
313 NH<sub>3</sub>SO<sub>4</sub>). Seed stock solution was then added. Crystals appeared overnight and continued growing  
314 for about a week, yielding relatively large, often intergrown plate-shaped crystals<sup>2</sup>. Using an HPLC  
315 pump the crystalline slurry was fractured using tandem array stainless steel ¼ inch diameter  
316 filters<sup>35</sup>. For beamtime 1 (March experiment) the first tandem array contained 100 and 40 µm  
317 filters followed by a second tandem array of 40, 20, 10 and 10 µm filters. For beamtime 2 (May  
318 experiment), the crystals were further fractured using a tandem array of 10, 5, 2 and 2 µm stainless  
319 steel ¼ inch diameter filters. On average, the largest crystal dimensions of the crystallites were  
320 ~15 µm (Supplementary Fig. 1a) and ~9 µm (Supplementary Fig. 1b) for beamtimes 1 and 2,  
321 respectively.

322

323

## 324 **Laser power titration**

325 Time-resolved spectroscopic data for estimating the extent of photolysis as a function of laser  
326 power density were obtained using a 6 mM hhMbCO solution. The sample was placed in a  
327 rectangular borosilicate glass tube sealed with wax to keep the solution CO saturated. The optical  
328 path length was 50  $\mu\text{m}$  and the thickness of the glass tube was 1mm. The optical density at the  
329 pump laser wavelength (532 nm) was  $\sim 0.5$ . An identical tube filled with the buffer solution (0.1  
330 M Tris HCl pH 8.0) was used as a blank.

331

332 The fs laser pulses were generated by a Ti-sapphire amplifier (Legend, Coherent) seeded by a Mira  
333 fs oscillator. The laser output was divided into two branches: The vast majority was used as input  
334 of an optical parametric amplifier (Topas, LightConversion) to generate the pump pulses at 532  
335 nm, while the remaining fraction was sent onto a sapphire crystal to generate short white-light  
336 pulses. Correction for white light temporal chirp (of  $< 2\text{ps}$  over the probed window) was not needed  
337 at the time delay of interest. Mechanical choppers were used to lower the original 1 kHz repetition  
338 rate of both pump and probe pulses to 1 Hz and 500 Hz respectively. Pump and probe beams were  
339 spatially and temporally overlapped at the sample position and the relative time delay was set using  
340 a delay line. Pump pulses were focused to a FWHM of about 0.1 mm, while the probing white-  
341 light FWHM beam size was about 0.02 mm diameter (FWHM). Each time-resolved spectrum was  
342 obtained by averaging 60 consecutive pump-probe events. A Berek compensator was used to  
343 change the pump light polarization from linear to circular. The 80 fs pump pulses were stretched  
344 to  $\sim 230$  fs and  $\sim 430$  fs by inserting 10 and 20 cm water columns, respectively, along the pump  
345 laser path<sup>36</sup>. The difference spectra shown in Extended Data Fig. 1 were obtained using linearly



346 polarized pump light; analogous results were found using circularly polarized light (data not  
347 shown).

348

### 349 **Data collection at SwissFEL**

350 The TR-SFX experiment was performed in March (beamtime 1)/May (beamtime 2) 2019 using  
351 the Alvra Prime instrument at SwissFEL<sup>37</sup> (proposal #20181741). To follow the time-dependent  
352 light-induced dynamics, an optical pump, X-ray probe scheme was used. The repetition rate of the  
353 X-ray pulses was 50 Hz. Diffraction images were acquired at 50 Hz with a Jungfrau 16M detector  
354 operating in 4M mode. The outer panels were excluded to reduce the amount of data.

355 The X-ray pulses had a photon energy of 12 keV and a pulse energy of  $\sim 500 \mu\text{J}$ . The X-ray spot  
356 size, focused by Kirkpatrick-Baez mirrors, was  $4.9 \times 6.4 \mu\text{m}^2$  in March 2019 and  $3.9 \times 4.1 \mu\text{m}^2$  in  
357 May 2019 (horiz.  $\times$  vert., FWHM). To reduce X-ray scattering, a beamstop was employed and the  
358 air in the sample chamber was pumped down to 100–200 mbar and substituted with helium. The  
359 protein crystals were introduced into the XFEL beam in a thin jet using a gas dynamic virtual  
360 (GDVN) nozzle injector<sup>38</sup>. The position of the sample jet was continuously adjusted to maximize  
361 the hit rate. In the interaction point, the XFEL beam intersected with a circularly polarized optical  
362 pump beam originating from an optical parametric amplifier producing laser pulses with  $60 \pm 5$  fs  
363 duration (FWHM) and  $530 \pm 9$  nm (FWHM) wavelength focal spots of  $120 \times 130 \mu\text{m}^2$  and  $150$   
364  $\times 120 \mu\text{m}^2$  (horiz.  $\times$  vert., FWHM), in March and May, respectively. The laser energy was 0.5 and  
365 1  $\mu\text{J}$  in May and 1–18  $\mu\text{J}$  in March 2019, corresponding to laser fluences of  $\sim 2.5$  to  $\sim 101$   $\text{mJ}/\text{cm}^2$   
366 and laser power densities of  $\sim 40$  to  $1700$   $\text{GW}/\text{cm}^2$  (see Extended Data Table 2). Using an  
367 absorption coefficient of  $11,600 \text{ M}^{-1}\text{cm}^{-1}$  for horse heart carboxymyoglobin at 530 nm, this results  
368 in nominally  $\sim 0.3$  to 12 absorbed photons/heme at the front of a crystal facing the pump laser

369 beam. Time-zero was determined in the pumped-down chamber at the same low-pressure helium  
370 atmosphere used for data collection. Information from a THz timing tool was used for determining  
371 the actual time delay. A power titration was performed at a 10 ps time delay (March 2019). Full  
372 time series were collected for pump laser fluences of 5 (May), 23 and 101 mJ/cm<sup>2</sup> (March). For  
373 the 5 mJ/cm<sup>2</sup> time series, the time delay could be set with sufficient reproducibility that each time  
374 point could be collected as a single data set, with nominal time delays of  $\Delta t = 150, 225, 300, 375,$   
375  $450, 525, 600, 750, 900,$  and 1300 fs. Using the timing tool available at the beam line, the actual  
376 time delays of these datasets could then be determined to be 254, 327, 402, 471, 627, 702, 847,  
377 1001 and 1401 fs, with widths of  $\sim 85$  fs. The number of images in each data set ranged from  
378  $\sim 10,000$  to  $>30,000$ , with  $>60,000$  in the dark data set. At the time the 23 and 101 mJ/cm<sup>2</sup> time  
379 series were collected, the available timing reproducibility was less, and data sets were collected at  
380 a series of preset nominal time delays ranging from 150 to 1300 fs that were then merged into large  
381 sets of  $\sim 150,000$  images for both fluences. These were then sorted according to the actual time  
382 delay of each image as determined by the timing tool of the beam line. Then, the data were split  
383 into smaller datasets by moving a window of 20,000 images over the data for each fluence in steps  
384 of 10,000 images. The timing distributions of these partial datasets have standard deviations of  
385 between 40 and 70 fs. In combination with the accuracy of the timing tool we estimate the true  
386 widths of these distributions to be  $\sim 100$  fs. It should be noted that the overlap of the time delay  
387 distributions caused by this "binning" of the 23 and 101 mJ/cm<sup>2</sup> data will result in a "smearing  
388 out" of time-dependent effects.

389 In each case, every 11<sup>th</sup> pulse of the pump laser was blocked, so that a series of ten light activated  
390 and one dark diffraction pattern were collected in sequence. High-quality dark data sets were  
391 generated by merging all laser-off patterns as well as separately collected, dedicated laser-off runs.

392 The latter were also used to confirm that the interleaved dark data in the light runs were indeed  
393 dark and not illuminated accidentally.

### 394 **Diffraction data analysis**

395 Diffraction data were processed using CrystFEL 0.8.0<sup>39</sup>; Bragg peaks were identified using the  
396 peakfinder8 algorithm and indexing was performed using XGANDALF<sup>40</sup>, DIRAX<sup>41</sup>, XDS<sup>42</sup> and  
397 MOSFLM<sup>43</sup>. After Monte-Carlo integration<sup>44,45</sup>, occupancies of the photolyzed state were  
398 determined by calculating  $\{|\overrightarrow{F_{light}}| - |\overrightarrow{F_{dark}}|, \varphi_{model}\}$  electron density maps using phases from a  
399 model without the CO ligand. The heights of the peaks for the CO in the ground (dark) and  
400 photolyzed CO\* states were then used to calculate the occupancy  $f$  using:

$$401 \quad f = \frac{\rho_{CO^*}}{\rho_{dark} + \rho_{CO^*}}$$

402 where  $\rho_{CO^*}$  and  $\rho_{dark}$  are the peak heights for the dark- and CO\*-state CO peaks, respectively.  
403 These occupancies are shown in Figures 1 and 2.

404 To obtain refined structures of the photolyzed states, structure factors were extrapolated to full  
405 occupancy using the linear extrapolation approximation<sup>46,47</sup>. Briefly, the amplitudes  
406  $|\overrightarrow{F_{extrapolated}}|$  corresponding to 100% occupancy were calculated using the formula:

$$407 \quad |\overrightarrow{F_{extrapolated}}| = \frac{(|\overrightarrow{F_{light}}| - |\overrightarrow{F_{dark}}|)}{f} + |\overrightarrow{F_{dark}}|$$

408 where  $|\overrightarrow{F_{light}}|$  and  $|\overrightarrow{F_{dark}}|$  are the measured amplitudes of the light- and dark state structure factors,  
409 respectively, and  $f$  is the estimated occupancy of the photolyzed state.

410 Importantly, we found that the best apparent occupancy to be used for extrapolation (that is, the  
411 occupancy that results in maps that exclusively show the photolyzed state) differs from those found  
412 from difference electron density maps and is sensitive to resolution limits, weighting schemes etc.  
413 and must be determined anew for each case. This was done by increasing the assumed occupancy  
414 until dark state features became apparent in the extrapolated electron density maps<sup>46-48</sup>, i.e. where  
415 density for unphotolyzed (i.e. heme-bound) CO became visible. To this end, light data were scaled  
416 to the dark data using SCALEIT<sup>49</sup> from the CCP4 suite<sup>50</sup> using Wilson scaling. After scaling, light-  
417 dark differences were calculated and used for the calculation of extrapolated structure factors,  
418 using assumed occupancies ranging from 0.05 to 0.7 in steps of 0.05. Each set of extrapolated  
419 amplitudes was combined with dark state phases and an  $\{|\overrightarrow{F_{extrapolated}}|, \varphi_{dark}\}$  map was calculated  
420 using PHENIX<sup>51</sup>. The electron density in this map at the position of the dark-state CO oxygen  
421 atom was determined and plotted against the assumed occupancy. The resulting data points were  
422 fitted with a simple asymptotic function, and the occupancy at which this function crossed  $1.0 \sigma$   
423 (i.e. where an unphotolyzed CO would have become visible) should then yield the occupancy for  
424 a particular time delay.

425 These apparent occupancies, too, showed an asymptotic increase with delay time as did those  
426 determined from difference map peaks (see above). As we interpret this to be an artefact caused  
427 by disorder of the CO at early time delays, the final occupancies used to calculate extrapolated  
428 structure factors were set to the plateau value estimated for the respective pump pulse fluences  
429 (0.2, 0.3 and 0.42, for 5, 23 and 101 mJ/cm<sup>2</sup> fluence, respectively). A model of photolyzed CO  
430 myoglobin was then refined against each of the resulting extrapolated data sets using phenix.refine  
431 build 1.19.2\_4158<sup>45</sup>, using a heme geometry in which the planarity restraints were relaxed to allow  
432 the heme to respond to photolysis. We investigated the use of different low- and high-resolution

433 limits. Using a low-resolution limit of 30 Å worked for some data sets, but for others resulted in  
434 problems during light-dark scaling, likely due to differences in beam stop placement. However,  
435 we found that a low-resolution limit of 10.0 Å could be used for all data sets and therefore imposed  
436 this for all structure factor extrapolations. Moreover, while the individual dark- and light datasets  
437 extend to 1.4-1.3 Å resolution, paired refinement<sup>52</sup> suggested that the extrapolated data were useful  
438 in refinement to a resolution of 1.6 Å (not shown). This is due to the errors introduced by the  
439 extrapolation process<sup>46-48</sup>. Indeed, extrapolation may even introduce negative structure factor  
440 amplitudes into the data set. However, at 1.6 Å resolution less than ten percent of our extrapolated  
441 structure factors are affected by this problem and "rescuing" them using the methods recently  
442 evaluated by de Zitter and coworkers<sup>53</sup> did not result in appreciable improvements. We therefore  
443 did not apply these methods. The dark data were used to their respective resolution limits. We also  
444 evaluated the usefulness of Q-weighting<sup>54</sup> in the calculation of extrapolated structure factors, but  
445 found no apparent improvement in data quality and therefore did not use it for the results presented  
446 here.

447 Structures were analyzed using COOT<sup>55,56</sup>, PYMOL<sup>57</sup> and custom-written python scripts using  
448 NumPy<sup>58</sup> and SciPy<sup>59</sup>. To obtain error estimates for structural parameters such as bond lengths and  
449 torsion angles, bootstrap resampling was performed as follows: of each dataset, ~100 resampled  
450 versions were created using a sample-and-replace algorithm. These were used to refine ~100  
451 versions of each structure, which were used to determine standard deviations. The number of 100  
452 resampled versions was chosen as this has been shown to result in sufficient sampling<sup>48,60</sup> while  
453 still being computationally tractable.

454

455

## 456 **Quantum Chemistry**

457 For the calculation of the absorption spectra and attachment-detachment density analysis, a  
458 reduced model in gas phase was constructed that includes the Fe-porphyrin along with CO on one  
459 side of the porphyrin plane and an imidazole (part of the proximal histidine) on the other side. The  
460 geometry was optimized at the DFT/B3LYP/LANL2DZ level. The absorption spectra were  
461 computed at the optimized singlet ground state geometry at XMS-CASPT2/CASSCF/ANO-RCC-  
462 VDZP level using OpenMolcas<sup>61,62</sup>. An active space of 10 electrons in 9 orbitals was used (5d  
463 orbitals of iron and 4  $\pi$  orbitals). The stick spectra were convoluted with Gaussians of 0.1 eV full  
464 width at half maximum to obtain the spectral envelope.

465 For the relaxed scan along the Fe-C(O) dissociation coordinate, the geometries of the model system  
466 were optimized at fixed Fe-C(O) bond lengths on the lowest quintet ground state at the DFT level.  
467 XMS-CASPT2 calculations were performed at these geometries to obtain the PES cut, to extract  
468 60 singlets included in the state-averaging to account for the dissociative state corresponding to  
469 the sequential two-photon absorption model.

470 The QM/MM model was constructed on the basis of the crystal structure of the horse heart  
471 myoglobin (PDB code 1DWR)<sup>63</sup>. The protein was solvated in a box of 11684 water molecules.  
472 First, a minimization of the whole system was performed, followed by an NVT dynamics of 125  
473 ps and a production run of 10 ns using Tinker 8.2.1<sup>64</sup>. From the MD, we extracted several snapshots  
474 to perform QM/MM MD, using a development version of GAMESS-US/Tinker<sup>65</sup> The QM region  
475 includes the heme, CO and parts of the proximal and the distal histidines and was described at the  
476 DFT level. The rest of the system is described at the MM level with the CHARMM36m<sup>66</sup> force  
477 field. A time step of 1 fs was used for the QM/MM molecular dynamics simulations.

478 **Acknowledgements**

479 We are grateful to Matteo Levantino for providing UV-vis reference spectra of deoxy myoglobin  
480 and Mb.CO. SB, MHR and MC acknowledge the support by the French National Research  
481 Agency via the grant ANR-19-CE29-0018 (MULTICROSS). We acknowledge support by the  
482 Max Planck Society.

483 **Data Availability and Code Availability**

484 Structures have been deposited with the PDB (accession codes 8BKI, 8BKJ, 8BKK, 8BKL,  
485 8BKM, 8BKN, 8BKH, 8BKO, 8BKP, 8BKQ, 8BKR, 8BKS, 8BKT, 8BKU, 8BKV, 8BKW,  
486 8BKX, 8BM8, 8BMA, 8BMB, 8BMC, 8BME, 8BMF, 8BMG, 8BMH, 8BMI, 8BMJ, 8BMK,  
487 8BML, 8BMM, 8BMN, 8BNC, 8BND, 8BNE, 8BNF, 8BNG, 8BNH, 8BNI, 8BNJ, 8BNK,  
488 8BNL, 8BNM, 8BNN, 8BNO, and 8BNP), stream files, extrapolated structure factor amplitudes,  
489 analysis scripts and relaxed heme geometry description with zenodo.com under doi  
490 10.5281/zenodo.7341458.

491 Analysis scripts can be retrieved from <https://github.com/tbarends/>

492 **Competing interests**

493 The authors declare no competing interests.

494 **Supplementary Information is available for this paper.**

495 Correspondence and requests for materials should be addressed to TRMB, MHR, IS.

496

497 **Author Contributions**

498 E.H., R.L.S., I.S. prepared sample, G.S, M.C. performed optical power titration, P.J.M.J., G.S,  
499 M.C., did laser work at SwissFEL,  
500 G.S., C.C., P.J.M. J., G.K., C.J.M., M.C. operated the Alvra instrument at SwissFEL; T.R.M.B,  
501 A.G., G.S., C.C., J-P.C, L.F.,M.L.G.,M.H., P.J.M.J., M.K. G.K. K.N. G.N.K., D.O.M.S. M.W.,  
502 R.B.D. R.L.S, C.J.M. I.S. performed data collection at SwissFEL;  
503 M.K., M.L.G, M.S., G.N.K., R.L.S., R.B.D. injected the crystals at SwissFEL;  
504 T.R.M.B, A.G., J-P.C, L.F., M.H., K.N., D.O. performed data analysis at SwissFEL;  
505 S.B. and M.H-R. performed quantum chemistry calculations;  
506 T.R.M.B., A.G. and M.H. performed off-line data analysis; data were analyzed by T.R.M.B. and  
507 I.S.; C.B. and B.M. provided spectroscopic input; T.R.M.B and I.S. wrote the manuscript with  
508 input from all authors.  
509



510 **Figures**

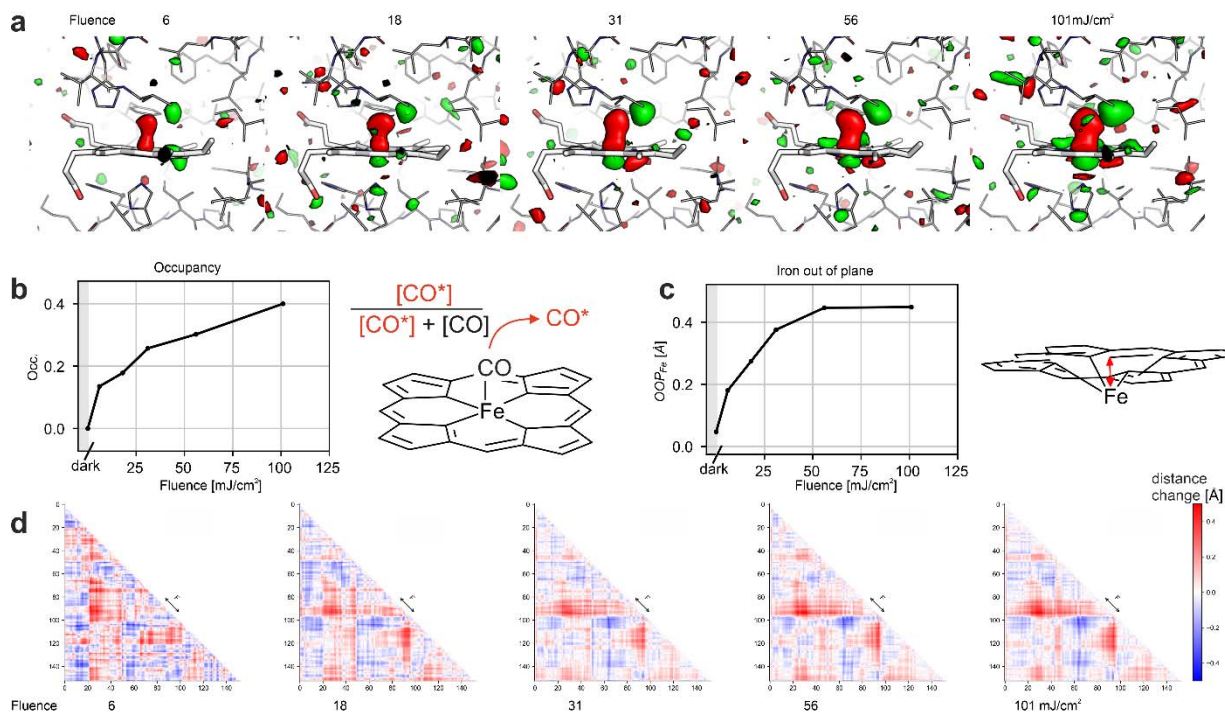

511

512 **Figure 1. Crystallographic power titration at 10 ps time delay.** a) Difference electron density  
 513 maps, contoured at +3.0 (green) and -3.0 (red) sigma, overlaid on the dark-state structure of  
 514 myoglobin for the various pump energies. b) Apparent occupancy of the CO\* state as a function  
 515 of pump laser fluence (mJ/cm<sup>2</sup>). The occupancy was determined by dividing the CO\* peak  
 516 height by the sum of the CO\* and dark-state CO peak heights in mFo-DFc omit maps. c) Iron-  
 517 out-of-plane distance as a function of pump energy. d) C $\alpha$ -C $\alpha$ -distance change matrices ("Go-  
 518 plots"<sup>67</sup>) for the various pump laser fluences. Red indicates an increase, blue a decrease in  
 519 distance. The F-helix (indicated) containing the heme-coordinating His93 moves away from  
 520 several other elements (B, C, D, E, and G helices) and the E helix moves toward the FG corner  
 521 and the H helix. Difference matrix plots between different pump laser fluences are shown in  
 522 Extended Data Fig. 3.

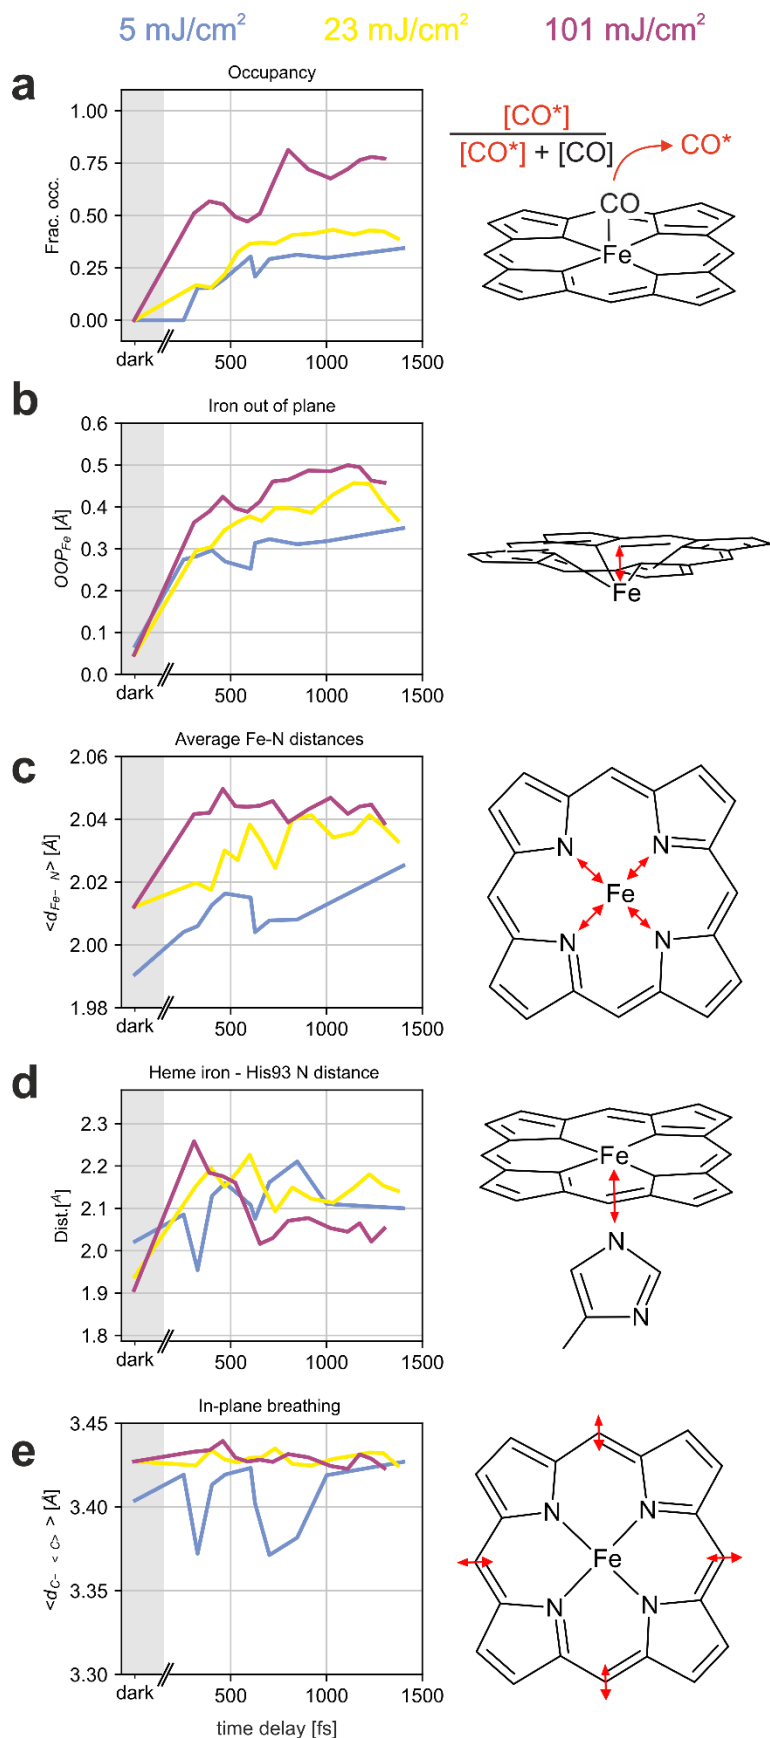

**Figure 2. Heme structural dynamics.** a) Apparent CO\* occupancy. Whereas at 5 and 23 mJ/cm<sup>2</sup> there is a smooth, slow increase, at 101 mJ/cm<sup>2</sup> there is a rapid initial rise, followed by an equally slow increase to the final amplitude. The 101 mJ/cm<sup>2</sup> curve can be understood as a superposition of contributions from the multiphoton-excited “front end” of the crystals with the few-photon excited “rear end” of the crystals (see Supplementary Note 1, Extended Data Fig. 2), resulting in almost instantaneous and apparently increasing occupancies of CO\*, respectively. b) The iron-out-of-plane distance shows a larger amplitude with increasing fluence, as does c) the average distance between the iron atom and the porphyrin N atoms. d) The distance between heme iron and proximal His93 NE2 atom, too shows differences between the fluences used, with the lowest fluence showing an oscillation and the highest fluence first going up and then settling at a lower amplitude. e) The heme in-plane breathing ( $\nu_7$  mode), determined as the average distance of the heme *meso* carbon atoms to the center of the heme, also varies with the fluence, with again the lowest fluence showing an oscillation and the higher fluences do not. Estimates for the oscillation periods are indicated by red dashed lines in Extended Data Fig. 5. That figure also shows coordinate uncertainties.

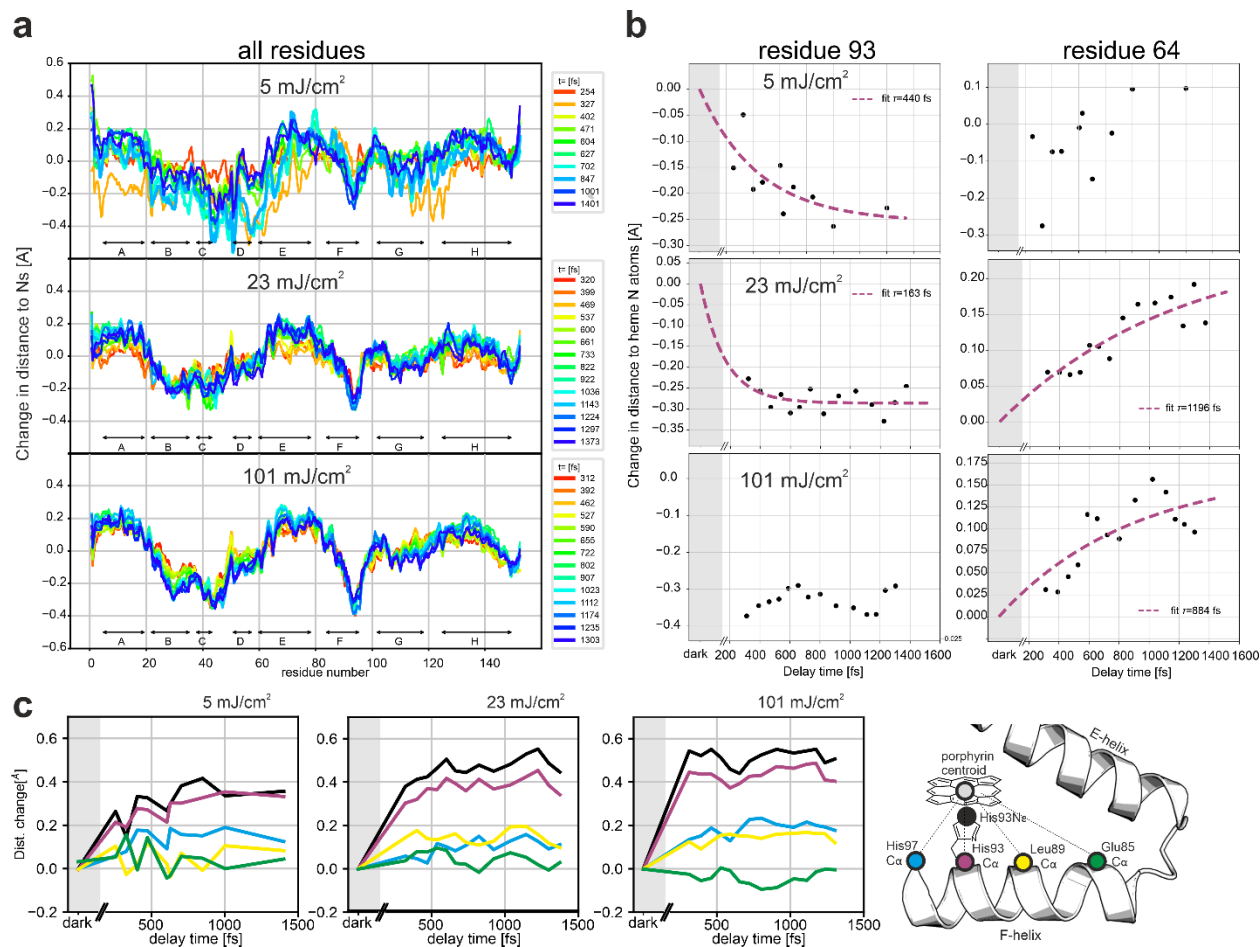

566

567

568 **Figure 3. Dynamics of correlated structural dynamics upon MbCO photolysis depends on**  
 569 **laser fluence.** a) Guallar-type plots<sup>29</sup>, showing the change in distance of backbone N, Ca, and C  
 570 atoms to the heme nitrogens for each time delay, for 5, 23, and 101 mJ/cm<sup>2</sup> pump pulse energy.  
 571 The speed of the changes is strongly fluence dependent. Correlated motions of helical elements  
 572 show different temporal evolutions with time in particular for the 5 mJ/cm<sup>2</sup> data, but move  
 573 generally very fast in the 101 mJ/cm<sup>2</sup> data, obscuring the sequence of events. For example, the  
 574 displacement of the His93 main chain from the heme nitrogen atoms or heme centroid has a time  
 575 constant of  $\tau \sim 320$  fs and  $\tau \sim 210$  fs for the 5 and 23 mJ/cm<sup>2</sup> data, respectively, but reaches its  
 576 final value within the first time delay for the 101 mJ/cm<sup>2</sup> data (b). In contrast, the movement of  
 577 the distal His64 is hardly affected on the ultrafast time scale (b). The length of the correlated  
 578 motion along the F-helix is clearly visible. Shown are displacements from the heme centroid of  
 579 the His93 nitrogen (black) and Ca (red), the Ca atoms of His 97 (blue) and Glu85 (green) which  
 580 are located at one helical turn upstream and downstream, respectively. Another turn further  
 581 upstream the effect is strongly reduced. Importantly, a strong oscillatory modulation (period of  $\sim$   
 582 300 fs) is only visible for the 5 mJ/cm<sup>2</sup> data.

583

584 **Extended Data**

585

586 **Extended Data Table 1: Crystallographic data and refinement statistics**

## 587 a. Power titration data

588

| Data set<br>pdb code             | dark<br>8bkh           | 6 mJ/cm <sup>2</sup><br>8bki | 18 mJ/cm <sup>2</sup><br>8bkj | 31 mJ/cm <sup>2</sup><br>8bkk | 56 mJ/cm <sup>2</sup><br>8bkl | 101 mJ/cm <sup>2</sup><br>8bkm |
|----------------------------------|------------------------|------------------------------|-------------------------------|-------------------------------|-------------------------------|--------------------------------|
| Space group                      |                        |                              | --- P2 <sub>1</sub> ---       |                               |                               |                                |
| unit cell                        |                        |                              |                               |                               |                               |                                |
| <i>a, b, c</i> [Å]               |                        |                              | --- 64.1 28.8 35.8 ---        |                               |                               |                                |
| $\alpha, \beta, \gamma$ [°]      |                        |                              | --- 90.0 106.9 90.0 ---       |                               |                               |                                |
| Resolution [Å]                   | 30.67-1.35 (1.39-1.35) | 10.00-1.33 (1.37-1.33)       | 10.00-1.33 (1.37-1.33)        | 10.00-1.33 (1.37-1.33)        | 10.00-1.39 (1.43-1.39)        | 10.00-1.33 (1.37-1.33)         |
| No. images                       | 19,193                 | 19258                        | 18465                         | 28225                         | 12767                         | 15911                          |
| <i>I</i> / $\sigma$ ( <i>I</i> ) | 4.0 (1.2)              | 4.2 (1.2)                    | 4.1 (1.2)                     | 4.8 (1.4)                     | 3.6 (1.3)                     | 4.0 (1.2)                      |
| R <sub>split</sub> [%]           | 22.4 (86.0)            | 21.3 (83.2)                  | 20.9 (83.5)                   | 18.0 (73.7)                   | 26.8 (78.9)                   | 21.5 (88.1)                    |
| CC*                              | 0.982 (0.72)           | 0.983 (0.745)                | 0.985 (0.702)                 | 0.988 (0.783)                 | 0.971 (0.692)                 | 0.984 (0.709)                  |
| Completeness [%]                 | 100.0 (99.6)           | 100.0 (99.5)                 | 99.9 (99.2)                   | 100.0 (99.9)                  | 100.0 (99.8)                  | 99.9 (99.1)                    |
| Multiplicity                     | 121.4 (33.1)           | 125.7 (30.4)                 | 119.4 (29.0)                  | 181.9 (44.2)                  | 87.2 (30.3)                   | 105.3 (25.5)                   |
| Wilson B [Å <sup>2</sup> ]       | 15.2                   | 15.1                         | 15.3                          | 15.3                          | 15.8                          | 15.6                           |
| Res. used [Å]                    | 20.44-1.35             | 10.0-1.6                     | 10.0-1.6                      | 10.0-1.6                      | 10.0-1.6                      | 10.0-1.6                       |
| Occupancy                        | n.a.                   |                              |                               |                               |                               |                                |
| R/R <sub>free</sub>              | 0.1833/<br>0.2271      | 0.1693/<br>0.2153            | 0.1677/<br>0.2112             | 0.1612/<br>0.2061             | 0.1777/<br>0.2265             | 0.1692/<br>0.2115              |
| No. atoms                        |                        |                              |                               |                               |                               |                                |
| Protein                          | 1194                   | 2388                         | 2388                          | 2388                          | 2388                          | 2388                           |
| Ligand/ion                       | 55                     | 110                          | 110                           | 110                           | 110                           | 110                            |
| Water                            | 112                    | 304                          | 304                           | 304                           | 304                           | 304                            |
| <i>B</i> -factors                |                        |                              |                               |                               |                               |                                |
| Protein                          | 18.4                   | 18.0                         | 18.4                          | 18.2                          | 18.8                          | 18.6                           |
| Ligand/ion                       | 16.0                   | 15.5                         | 16.4                          | 16.3                          | 16.9                          | 17.0                           |
| Water                            | 28.6                   | 29.0                         | 29.9                          | 29.8                          | 30.7                          | 31.6                           |
| RMS bond deviations              |                        |                              |                               |                               |                               |                                |
| lengths [Å]                      | 0.007                  | 0.011                        | 0.011                         | 0.011                         | 0.011                         | 0.010                          |
| angles [°]                       | 1.00                   | 1.17                         | 1.18                          | 1.15                          | 1.17                          | 1.15                           |

589

590

591 b. 5 mJ/cm<sup>2</sup> time series data

| Data set                            | dark                    | 254 fs<br>(nom. 150)   | 327 fs<br>(nom. 225)   | 402 fs<br>(nom. 300)   | 471 fs<br>(nom. 375)   | 604 fs<br>(nom. 450)   | 627 fs<br>(nom. 525)                | 702 fs<br>(nom. 600)   | 847 fs<br>(nom. 750)   | 1001 fs<br>(nom. 900)  | 1401 fs<br>(nom. 1300) |
|-------------------------------------|-------------------------|------------------------|------------------------|------------------------|------------------------|------------------------|-------------------------------------|------------------------|------------------------|------------------------|------------------------|
| pdb code                            | 8bkn                    | 8bko                   | 8bkp                   | 8bkq                   | 8bkr                   | 8bks                   | 8bkt                                | 8bku                   | 8bkv                   | 8bkw                   | 8bkx                   |
| Space group                         | <i>P</i> 2 <sub>1</sub> |                        |                        |                        |                        |                        | ----- <i>P</i> 2 <sub>1</sub> ----- |                        |                        |                        |                        |
| unit cell                           |                         |                        |                        |                        |                        |                        | ----- 63.1, 28.4, 35.3 -----        |                        |                        |                        |                        |
| <i>a, b, c</i> [Å]                  |                         |                        |                        |                        |                        |                        | ----- 90, 107, 90 -----             |                        |                        |                        |                        |
| $\alpha, \beta, \gamma$ [°]         |                         |                        |                        |                        |                        |                        |                                     |                        |                        |                        |                        |
| Resolution [Å]                      | 30.12-1.29 (1.32-1.29)  | 30.17-1.32 (1.35-1.32) | 30.17-1.35 (1.39-1.35) | 30.17-1.32 (1.35-1.32) | 30.17-1.32 (1.35-1.32) | 30.17-1.27 (1.30-1.27) | 30.17-1.35 (1.39-1.35)              | 30.17-1.32 (1.35-1.32) | 30.17-1.32 (1.35-1.32) | 30.17-1.32 (1.35-1.32) | 30.17-1.27 (1.30-1.27) |
| No. images                          | 63,521                  | 29,916                 | 9,667                  | 27,781                 | 14,418                 | 33,341                 | 13,767                              | 27,396                 | 24,926                 | 25,888                 | 23,896                 |
| <i>I</i> $\sigma$ ( <i>I</i> )      | 5.7 (1.6)               | 4.2 (1.4)              | 3.0 (1.0)              | 4.2 (1.3)              | 3.2 (1.1)              | 4.1 (1.1)              | 3.2 (1.2)                           | 4.1 (1.5)              | 4.0 (1.4)              | 4.1 (1.4)              | 3.8 (0.9)              |
| <i>R</i> <sub>split</sub> [%]       | 14.7 (65.8)             | 21.2 (75.5)            | 34.0 (90.6)            | 21.4 (78.5)            | 29.6 (97.2)            | 20.4 (112.4)           | 32.0 (83.7)                         | 22.3 (77.6)            | 22.4 (77.2)            | 22.2 (75.7)            | 23.3 (105.4)           |
| CC*                                 | 0.992 (0.835)           | 0.982 (0.815)          | 0.954 (0.654)          | 0.983 (0.764)          | 0.968 (0.693)          | 0.986 (0.718)          | 0.959 (0.747)                       | 0.982 (0.783)          | 0.981 (0.801)          | 0.982 (0.804)          | 0.979 (0.745)          |
| Completeness [%]                    | 99.9 (99.1)             | 99.9 (98.6)            | 99.5 (94.9)            | 99.9 (98.7)            | 99.4 (94.4)            | 99.6 (96.5)            | 99.7 (97.4)                         | 99.8 (98.3)            | 99.8 (97.8)            | 99.9 (98.7)            | 99.2 (93.5)            |
| Multiplicity                        | 264.9 (42.9)            | 129.7 (28.5)           | 47.5 (13.8)            | 124.9 (27.5)           | 62.6 (14.2)            | 132.7 (17.5)           | 62.4 (17.3)                         | 121.8 (27.2)           | 111.8 (24.5)           | 119.9 (26.5)           | 103.5 (13.9)           |
| Wilson B [Å <sup>2</sup> ]          | 13.7                    | 14.1                   | 13.9                   | 14.1                   | 13.9                   | 13.8                   | 14.0                                | 13.9                   | 13.8                   | 14.1                   | 13.5                   |
| Res. used [Å]                       | 30.12-1.29              | 10.0-1.6               | 10.0-1.6               | 10.0-1.6               | 10.0-1.6               | 10.0-1.6               | 10.0-1.6                            | 10.0-1.6               | 10.0-1.6               | 10.0-1.6               | 10.0-1.6               |
| Occupancy                           | n.a.                    | 0.2                    | 0.2                    | 0.2                    | 0.2                    | 0.2                    | 0.2                                 | 0.2                    | 0.2                    | 0.2                    | 0.2                    |
| <i>R</i> / <i>R</i> <sub>free</sub> | 0.1750/<br>0.2095       | 0.1617/<br>0.2021      | 0.1819/<br>0.2114      | 0.1643/<br>0.2015      | 0.1730/<br>0.1950      | 0.1620/<br>0.1936      | 0.1779/<br>0.2172                   | 0.1649/<br>0.2015      | 0.1637/<br>0.1945      | 0.1644/<br>0.2006      | 0.1661/<br>0.1988      |
| No. atoms                           |                         |                        |                        |                        |                        |                        |                                     |                        |                        |                        |                        |
| Protein                             | 1194                    | 2388                   | 2388                   | 2388                   | 2388                   | 2388                   | 2388                                | 2388                   | 2388                   | 2388                   | 2388                   |
| Ligand/ion                          | 55                      | 110                    | 110                    | 110                    | 110                    | 110                    | 110                                 | 110                    | 110                    | 110                    | 110                    |
| Water                               | 112                     | 242                    | 242                    | 242                    | 242                    | 242                    | 242                                 | 242                    | 242                    | 242                    | 242                    |
| <i>B</i> -factors                   |                         |                        |                        |                        |                        |                        |                                     |                        |                        |                        |                        |
| Protein                             | 16.7                    | 16.5                   | 16.9                   | 17.4                   | 16.9                   | 17.1                   | 17.2                                | 16.7                   | 16.5                   | 16.8                   | 16.7                   |
| Ligand/ion                          | 14.0                    | 14.4                   | 14.8                   | 16.5                   | 14.8                   | 14.9                   | 15.5                                | 14.8                   | 14.5                   | 14.4                   | 14.6                   |
| Water                               | 27.7                    | 26.7                   | 27.2                   | 27.2                   | 26.9                   | 27.5                   | 27.2                                | 27.6                   | 27.6                   | 27.0                   | 26.8                   |
| RMS bond deviations                 |                         |                        |                        |                        |                        |                        |                                     |                        |                        |                        |                        |
| lengths [Å]                         | 0.010                   | 0.013                  | 0.014                  | 0.012                  | 0.012                  | 0.012                  | 0.013                               | 0.013                  | 0.013                  | 0.012                  | 0.012                  |
| angles [°]                          | 1.03                    | 1.26                   | 1.37                   | 1.15                   | 1.19                   | 1.10                   | 1.27                                | 1.35                   | 1.33                   | 1.14                   | 1.20                   |

592

593

594 c. 23 mJ/cm<sup>2</sup> time series data

595

| Data set                         | dark*<br>8bkh             | 320 fs<br>8bm8            | 399 fs<br>8bma            | 469 fs<br>8bmb            | 537 fs<br>8bmc            | 600 fs<br>8bme            | 661 fs<br>8bmf            | 733 fs<br>8bmg            | 822 fs<br>8bmh            | 922 fs<br>8bmi            | 1036 fs<br>8bmj           | 1143 fs<br>8bmk           | 1224 fs<br>8bml           | 1297 fs<br>8bmm           | 1373 fs<br>8bmn           |
|----------------------------------|---------------------------|---------------------------|---------------------------|---------------------------|---------------------------|---------------------------|---------------------------|---------------------------|---------------------------|---------------------------|---------------------------|---------------------------|---------------------------|---------------------------|---------------------------|
| Space group                      | <i>P</i> 2 <sub>1</sub>   |                           |                           |                           |                           |                           |                           |                           |                           |                           |                           |                           |                           |                           |                           |
| unit cell                        |                           |                           |                           |                           |                           |                           |                           |                           |                           |                           |                           |                           |                           |                           |                           |
| <i>a, b, c</i> [Å]               | 64.1 28.8                 |                           |                           |                           |                           |                           |                           |                           |                           |                           |                           |                           |                           |                           |                           |
| $\alpha, \beta, \gamma$ [°]      | 35.8                      |                           |                           |                           |                           |                           |                           |                           |                           |                           |                           |                           |                           |                           |                           |
|                                  | 90.0 106.9                |                           |                           |                           |                           |                           |                           |                           |                           |                           |                           |                           |                           |                           |                           |
|                                  | 90.0                      |                           |                           |                           |                           |                           |                           |                           |                           |                           |                           |                           |                           |                           |                           |
| Resolution [Å]                   | 30.67-1.35<br>(1.39-1.35) | 30.70-1.32<br>(1.35-1.32) | 30.70-1.32<br>(1.35-1.32) | 30.70-1.32<br>(1.35-1.32) | 30.70-1.32<br>(1.35-1.32) | 30.70-1.32<br>(1.35-1.32) | 30.70-1.32<br>(1.35-1.32) | 30.70-1.35<br>(1.39-1.35) | 30.70-1.35<br>(1.39-1.35) | 30.67-1.32<br>(1.35-1.32) | 30.67-1.32<br>(1.35-1.32) | 30.65-1.32<br>(1.35-1.32) | 30.70-1.32<br>(1.35-1.32) | 30.70-1.32<br>(1.35-1.32) | 30.70-1.32<br>(1.35-1.32) |
| No. images                       | 19,193                    | 20,000                    | 20,000                    | 20,000                    | 20,000                    | 20,000                    | 20,000                    | 20,000                    | 20,000                    | 20,000                    | 20,000                    | 20,000                    | 20,000                    | 20,000                    | 20,000                    |
| <i>I</i> / $\sigma$ ( <i>I</i> ) | 4.0 (1.2)                 | 3.7 (1.2)                 | 3.7 (1.1)                 | 3.7 (1.2)                 | 3.6 (1.2)                 | 3.6 (1.5)                 | 3.5 (1.1)                 | 3.7 (1.3)                 | 3.9 (1.3)                 | 4.0 (1.1)                 | 4.1 (1.1)                 | 3.8 (1.1)                 | 3.7 (1.3)                 | 3.6 (1.2)                 | 3.6 (1.6)                 |
| R <sub>split</sub> [%]           | 22.4 (86.0)               | 23.1 (86.8)               | 22.9 (88.1)               | 23.5 (89.2)               | 24.2 (90.9)               | 24.9 (97.2)               | 25.0 (94.9)               | 23.8 (80.4)               | 23.2 (78.7)               | 21.9 (91.6)               | 21.1 (92.0)               | 22.4 (92.3)               | 23.9 (89.5)               | 24.6 (91.1)               | 24.6 (93.5)               |
| CC*                              | 0.982<br>(0.72)           | 0.981<br>(0.764)          | 0.981<br>(0.767)          | 0.979<br>(0.709)          | 0.98<br>(0.695)           | 0.978<br>(0.657)          | 0.977<br>(0.723)          | 0.979<br>(0.771)          | 0.98<br>(0.807)           | 0.982<br>(0.71)           | 0.983<br>(0.616)          | 0.982<br>(0.624)          | 0.979<br>(0.677)          | 0.977<br>(0.626)          | 0.978<br>(0.667)          |
| Completeness [%]                 | 100.0<br>(99.6)           | 99.8 (97.2)               | 99.8 (97.3)               | 99.8 (97.3)               | 99.8 (97.2)               | 99.8 (97.7)               | 99.8 (97.6)               | 99.9 (99.3)               | 100.0<br>(99.7)           | 99.9 (99.2)               | 99.9 (99.3)               | 99.8 (98.2)               | 99.8 (97.6)               | 99.7 (96.9)               | 99.8 (97.3)               |
| Multiplicity                     | 121.4<br>(33.1)           | 82.3 (17.8)               | 83.1 (17.9)               | 83.6 (18.1)               | 82.7 (17.9)               | 81.6 (17.6)               | 80.5 (17.4)               | 89.4 (24.0)               | 103.9<br>(27.8)           | 117.3<br>(25.5)           | 119.6<br>(26.3)           | 101.2<br>(22.0)           | 87.2 (18.9)               | 82.3 (18.0)               | 81.4 (17.5)               |
| Wilson B [Å <sup>2</sup> ]       | 15.2                      | 14.4                      | 14.4                      | 14.3                      | 14.4                      | 14.4                      | 14.4                      | 14.8                      | 15.0                      | 15.0                      | 15.1                      | 14.9                      | 14.4                      | 14.3                      | 14.4                      |
| Res. used [Å]                    | 20.44-1.35                | 10.0-1.6                  | 10.0-1.6                  | 10.0-1.6                  | 10.0-1.6                  | 10.0-1.6                  | 10.0-1.6                  | 10.0-1.6                  | 10.0-1.6                  | 10.0-1.6                  | 10.0-1.6                  | 10.0-1.6                  | 10.0-1.6                  | 10.0-1.6                  | 10.0-1.6                  |
| Occupancy                        | n.a.                      | 0.3                       | 0.3                       | 0.3                       | 0.3                       | 0.3                       | 0.3                       | 0.3                       | 0.3                       | 0.3                       | 0.3                       | 0.3                       | 0.3                       | 0.3                       | 0.3                       |
| R/R <sub>free</sub>              | 0.1833/<br>0.2271         | 0.1727/<br>0.2156         | 0.1720/<br>0.2139         | 0.1710/<br>0.2145         | 0.1712/<br>0.2155         | 0.1730/<br>0.2207         | 0.1735/<br>0.2176         | 0.1725/<br>0.2199         | 0.1713/<br>0.2236         | 0.1679/<br>0.2173         | 0.1657/<br>0.2143         | 0.1725/<br>0.2207         | 0.1721/<br>0.2185         | 0.1730/<br>0.2216         | 0.1738/<br>0.2198         |
| No. atoms                        |                           |                           |                           |                           |                           |                           |                           |                           |                           |                           |                           |                           |                           |                           |                           |
| Protein                          | 1194                      | 2388                      | 2388                      | 2388                      | 2388                      | 2388                      | 2388                      | 2388                      | 2388                      | 2388                      | 2388                      | 2388                      | 2388                      | 2388                      | 2388                      |
| Ligand/ion                       | 55                        | 110                       | 110                       | 110                       | 110                       | 110                       | 110                       | 110                       | 110                       | 110                       | 110                       | 110                       | 110                       | 110                       | 110                       |
| Water                            | 112                       | 242                       | 242                       | 242                       | 242                       | 242                       | 242                       | 242                       | 242                       | 242                       | 242                       | 242                       | 242                       | 242                       | 242                       |
| <i>B</i> -factors                |                           |                           |                           |                           |                           |                           |                           |                           |                           |                           |                           |                           |                           |                           |                           |
| Protein                          | 18.4                      | 18.2                      | 18.7                      | 18.6                      | 18.6                      | 18.4                      | 18.5                      | 18.5                      | 18.4                      | 18.5                      | 18.5                      | 18.1                      | 18.3                      | 18.6                      | 18.6                      |
| Ligand/ion                       | 16.0                      | 16.7                      | 17.1                      | 16.8                      | 16.7                      | 16.8                      | 17.0                      | 17.2                      | 16.7                      | 16.7                      | 17.3                      | 16.5                      | 16.9                      | 17.3                      | 17.0                      |
| Water                            | 28.6                      | 30.4                      | 30.7                      | 30.4                      | 30.9                      | 30.8                      | 30.7                      | 30.4                      | 30.1                      | 30.6                      | 30.9                      | 30.6                      | 30.1                      | 30.8                      | 30.7                      |
| RMS bond deviations              |                           |                           |                           |                           |                           |                           |                           |                           |                           |                           |                           |                           |                           |                           |                           |
| lengths [Å]                      | 0.007                     | 0.011                     | 0.011                     | 0.011                     | 0.011                     | 0.011                     | 0.011                     | 0.010                     | 0.010                     | 0.011                     | 0.011                     | 0.011                     | 0.011                     | 0.011                     | 0.010                     |
| angles [°]                       | 1.00                      | 1.11                      | 1.10                      | 1.15                      | 1.14                      | 1.14                      | 1.13                      | 1.15                      | 1.11                      | 1.18                      | 1.16                      | 1.19                      | 1.21                      | 1.23                      | 1.14                      |

596 \* the dark state data are the same as those used for the power titration- and 101 mJ/cm<sup>2</sup> fluence experiments

597

598

599

600

601

602

603

604 d. 101 mJ/cm<sup>2</sup>

605

| Data set                            | dark*<br>8bkh             | 312 fs<br>8bnc            | 392 fs<br>8bnd            | 462 fs<br>8bne            | 527 fs<br>8bnf            | 590 fs<br>8bng            | 655 fs<br>8bnh            | 722 fs<br>8bni            | 802 fs<br>8bnj            | 907 fs<br>8bnk            | 1023 fs<br>8bnl           | 1112 fs<br>8bnm           | 1174 fs<br>8bnn           | 1235 fs<br>8bno           | 1303 fs<br>8bnp           |
|-------------------------------------|---------------------------|---------------------------|---------------------------|---------------------------|---------------------------|---------------------------|---------------------------|---------------------------|---------------------------|---------------------------|---------------------------|---------------------------|---------------------------|---------------------------|---------------------------|
| Space group                         | <i>P</i> 2 <sub>1</sub>   |                           |                           |                           |                           |                           |                           |                           |                           |                           |                           |                           |                           |                           |                           |
| unit cell                           |                           |                           |                           |                           |                           |                           |                           |                           |                           |                           |                           |                           |                           |                           |                           |
| <i>a, b, c</i> [Å]                  | 64.1 28.8                 |                           |                           |                           |                           |                           |                           |                           |                           |                           |                           |                           |                           |                           |                           |
| $\alpha, \beta, \gamma$ [°]         | 35.8                      |                           |                           |                           |                           |                           |                           |                           |                           |                           |                           |                           |                           |                           |                           |
|                                     | 90.0 106.9                |                           |                           |                           |                           |                           |                           |                           |                           |                           |                           |                           |                           |                           |                           |
|                                     | 90.0                      |                           |                           |                           |                           |                           |                           |                           |                           |                           |                           |                           |                           |                           |                           |
| Resolution [Å]                      | 30.67-1.35<br>(1.39-1.35) | 30.65-1.32<br>(1.35-1.32) | 30.65-1.32<br>(1.35-1.32) | 30.70-1.32<br>(1.35-1.32) | 30.70-1.35<br>(1.39-1.35) | 30.70-1.35<br>(1.39-1.35) | 30.70-1.32<br>(1.35-1.32) | 30.70-1.35<br>(1.39-1.35) | 30.70-1.32<br>(1.35-1.32) | 30.65-1.35<br>(1.39-1.35) | 30.65-1.35<br>(1.39-1.35) | 30.65-1.32<br>(1.35-1.32) | 30.65-1.32<br>(1.35-1.32) | 30.70-1.35<br>(1.39-1.35) | 30.70-1.35<br>(1.39-1.35) |
| No. images                          | 19,193                    | 20,000                    | 20,000                    | 20,000                    | 20,000                    | 20,000                    | 20,000                    | 20,000                    | 20,000                    | 20,000                    | 20,000                    | 20,000                    | 20,000                    | 20,000                    | 20,000                    |
| <i>I</i> / $\sigma$ ( <i>I</i> )    | 4.0 (1.2)                 | 3.5 (1.1)                 | 3.6 (1.2)                 | 3.5 (1.1)                 | 3.6 (1.3)                 | 3.7 (1.3)                 | 3.5 (1.0)                 | 3.7 (1.3)                 | 3.7 (1.6)                 | 4.1 (1.4)                 | 4.2 (1.3)                 | 3.9 (1.2)                 | 3.7 (1.1)                 | 3.8 (1.2)                 | 3.8 (1.4)                 |
| <i>R</i> <sub>split</sub> [%]       | 22.4 (86.0)               | 25.3 (96.8)               | 24.2 (95.5)               | 24.3 (97.3)               | 24.6 (81.6)               | 24.3 (81.5)               | 24.0<br>(105.8)           | 23.8 (79.6)               | 23.4 (90.8)               | 22.2 (77.1)               | 21.1 (77.4)               | 21.9 (98.7)               | 23.5 (95.3)               | 24.2 (77.2)               | 23.8 (77.6)               |
| CC*                                 | 0.982<br>(0.72)           | 0.976<br>(0.63)           | 0.98<br>(0.641)           | 0.981<br>(0.636)          | 0.978<br>(0.779)          | 0.979<br>(0.728)          | 0.98<br>(0.676)           | 0.98<br>(0.779)           | 0.981<br>(0.735)          | 0.982<br>(0.795)          | 0.984<br>(0.791)          | 0.983<br>(0.657)          | 0.98<br>(0.765)           | 0.978<br>(0.666)          | 0.98<br>(0.685)           |
| Completeness [%]                    | 100.0<br>(99.6)           | 99.8 (98.4)               | 99.8 (98.0)               | 99.8 (98.3)               | 100.0<br>(99.6)           | 99.9 (99.4)               | 99.8 (97.8)               | 99.9 (99.1)               | 99.8 (97.8)               | 99.9 (99.2)               | 100.0<br>(99.6)           | 99.9 (98.2)               | 99.8 (98.4)               | 99.9 (99.2)               | 99.9 (98.7)               |
| Multiplicity                        | 121.4<br>(33.1)           | 78.4 (16.9)               | 79.2 (17.1)               | 79.0 (17.0)               | 82.4 (22.1)               | 83.5 (22.3)               | 80.3 (17.4)               | 86.6 (23.4)               | 87.8 (19.1)               | 110.4<br>(30.2)           | 121.3<br>(33.5)           | 104.7<br>(22.7)           | 94.3 (20.5)               | 90.4 (24.1)               | 86.1 (23.0)               |
| Wilson B [Å <sup>2</sup> ]          | 15.2                      | 14.4                      | 14.5                      | 14.6                      | 14.7                      | 14.7                      | 14.5                      | 14.8                      | 14.7                      | 15.2                      | 15.4                      | 15.3                      | 14.9                      | 14.8                      | 14.8                      |
| Res. used [Å]                       | 20.44-1.35                | 10.0-1.6                  | 10.0-1.6                  | 10.0-1.6                  | 10.0-1.6                  | 10.0-1.6                  | 10.0-1.6                  | 10.0-1.6                  | 10.0-1.6                  | 10.0-1.6                  | 10.0-1.6                  | 10.0-1.6                  | 10.0-1.6                  | 10.0-1.6                  | 10.0-1.6                  |
| Occupancy                           | n.a.                      | 0.42                      | 0.42                      | 0.42                      | 0.42                      | 0.42                      | 0.42                      | 0.42                      | 0.42                      | 0.42                      | 0.42                      | 0.42                      | 0.42                      | 0.42                      | 0.42                      |
| <i>R</i> / <i>R</i> <sub>free</sub> | 0.1833/<br>0.2271         | 0.1722/<br>0.2168         | 0.1733/<br>0.2172         | 0.1724/<br>0.2173         | 0.1727/<br>0.2155         | 0.1713/<br>0.2121         | 0.1712/<br>0.2097         | 0.1714/<br>0.2161         | 0.1709/<br>0.2163         | 0.1700<br>0.2147          | 0.1668/<br>0.2084         | 0.1718/<br>0.2111         | 0.1713/<br>0.2161         | 0.1728/<br>0.2173         | 0.1737/<br>0.2189         |
| No. atoms                           |                           |                           |                           |                           |                           |                           |                           |                           |                           |                           |                           |                           |                           |                           |                           |
| Protein                             | 1194                      | 2388                      | 2388                      | 2388                      | 2388                      | 2388                      | 2388                      | 2388                      | 2388                      | 2388                      | 2388                      | 2388                      | 2388                      | 2388                      | 2388                      |
| Ligand/ion                          | 55                        | 110                       | 110                       | 110                       | 110                       | 110                       | 110                       | 110                       | 110                       | 110                       | 110                       | 110                       | 110                       | 110                       | 110                       |
| Water                               | 112                       | 242                       | 242                       | 242                       | 242                       | 242                       | 242                       | 242                       | 242                       | 242                       | 242                       | 242                       | 242                       | 242                       | 242                       |
| <i>B</i> -factors                   |                           |                           |                           |                           |                           |                           |                           |                           |                           |                           |                           |                           |                           |                           |                           |
| Protein                             | 18.4                      | 19.5                      | 19.1                      | 19.5                      | 19.4                      | 19.2                      | 19.5                      | 19.3                      | 19.3                      | 19.4                      | 19.4                      | 19.6                      | 19.5                      | 19.0                      | 19.3                      |
| Ligand/ion                          | 16.0                      | 18.8                      | 17.9                      | 18.5                      | 18.3                      | 18.4                      | 19.1                      | 18.7                      | 19.1                      | 18.5                      | 18.5                      | 18.6                      | 18.2                      | 18.2                      | 19.1                      |
| Water                               | 28.6                      | 33.0                      | 31.9                      | 32.8                      | 32.4                      | 32.0                      | 32.8                      | 32.4                      | 33.0                      | 32.8                      | 32.1                      | 32.8                      | 32.3                      | 31.8                      | 32.7                      |
| RMS bond deviations                 |                           |                           |                           |                           |                           |                           |                           |                           |                           |                           |                           |                           |                           |                           |                           |
| lengths [Å]                         | 0.007                     | 0.010                     | 0.010                     | 0.011                     | 0.011                     | 0.011                     | 0.010                     | 0.011                     | 0.010                     | 0.010                     | 0.010                     | 0.011                     | 0.011                     | 0.010                     | 0.010                     |
| angles [°]                          | 1.00                      | 1.12                      | 1.10                      | 1.19                      | 1.16                      | 1.16                      | 1.14                      | 1.18                      | 1.12                      | 1.16                      | 1.15                      | 1.19                      | 1.19                      | 1.14                      | 1.13                      |

606 \* the dark state data are the same as those used for the power titration- and 25 mJ/cm<sup>2</sup> fluence experiments

607

608 **Extended Data Table2: Laser and excitation parameters**

609

|                                       | Pulse energy (μJ) | Laser fluence (mJ/cm <sup>2</sup> ) <sup>°</sup> | Laser power (GW/cm <sup>2</sup> ) <sup>°</sup> | largest crystal dimension ⊥ jet flow <sup>¶</sup> (μm) | Average # absorbed photons <sup>*</sup> | # absorbed photons front side of crystal <sup>‡</sup> | # absorbed* photons back side of crystal <sup>‡</sup> |
|---------------------------------------|-------------------|--------------------------------------------------|------------------------------------------------|--------------------------------------------------------|-----------------------------------------|-------------------------------------------------------|-------------------------------------------------------|
| 1 <sup>st</sup> beamtime <sup>#</sup> | 1 <sup>⊖</sup>    | 6                                                | 75                                             | ~12                                                    | 0.3                                     | 0.7                                                   | 0.1                                                   |
|                                       | 3.1 <sup>⊖</sup>  | 18                                               | 233                                            | ~12                                                    | 1.0                                     | 2.0                                                   | 0.4                                                   |
|                                       | 4                 | 23                                               | 301                                            | ~12                                                    | 1.3                                     | 2.7                                                   | 0.5                                                   |
|                                       | 5 <sup>⊖</sup>    | 31                                               | 376                                            | ~12                                                    | 1.6                                     | 3.3                                                   | 0.6                                                   |
|                                       | 10 <sup>⊖</sup>   | 56                                               | 763                                            | ~12                                                    | 3.2                                     | 6.6                                                   | 1.2                                                   |
|                                       | 18                | 101                                              | 1355                                           | ~12                                                    | 5.8                                     | 12                                                    | 2.2                                                   |
| 2 <sup>nd</sup> beamtime <sup>§</sup> | 0.5 <sup>⊖</sup>  | 2.4                                              | 40                                             | ~9                                                     | 0.2                                     | 0.3                                                   | 0.08                                                  |
|                                       | 1.0               | 4.8                                              | 81                                             | ~9                                                     | 0.3                                     | 0.6                                                   | 0.2                                                   |
| Barends 2015 <sup>2</sup>             | 5                 | 57                                               | 380                                            | ~5                                                     | 4.8                                     | 6.7                                                   | 3.3                                                   |

610

611 <sup>°</sup> Maximum intensity in center of the Gaussian beam. It is not only the energy density (fluence)  
 612 that matters but also the power density (irradiance). The latter takes into account the pulse  
 613 duration. Very high power can lead to very high electric field strengths that can result in strong  
 614 polarization effects or multi-photon ionization. The linear regime and the specific side reactions  
 615 depend on the properties of the chromophore.

616 <sup>#</sup> Pump laser parameters: 70-80 fs (calculated), 530 ± 9 nm FWHM, spot size (120 μm (hor) x  
 617 130 μm (ver) FWHM), circularly polarized

618 <sup>⊖</sup> Power titration data only, no time-series collected (only for rows shown with grey background)

619 <sup>⊖</sup> At short time-delays the light-induced signal was too weak for crystallographic analysis

620 <sup>§</sup> Pump laser parameters: 70-80 fs (calculated, 60 fs ± 5 fs measured), 530 ± 9 nm FWHM, spot  
 621 size (150 μm (hor) x 120 μm (ver) FWHM)

622 <sup>¶</sup> The crystals flow-align in the liquid microjet, with the longest crystal dimension oriented along  
 623 the jet axis. The 1/e penetration depth of ~530 nm light is ~7 μm for the monoclinic MbCO  
 624 crystals

625 <sup>\*</sup> Assuming equal cross sections for the first and subsequent absorption events

626 <sup>‡</sup> See Extended Data Fig. 2, Supplementary Fig. 2

627



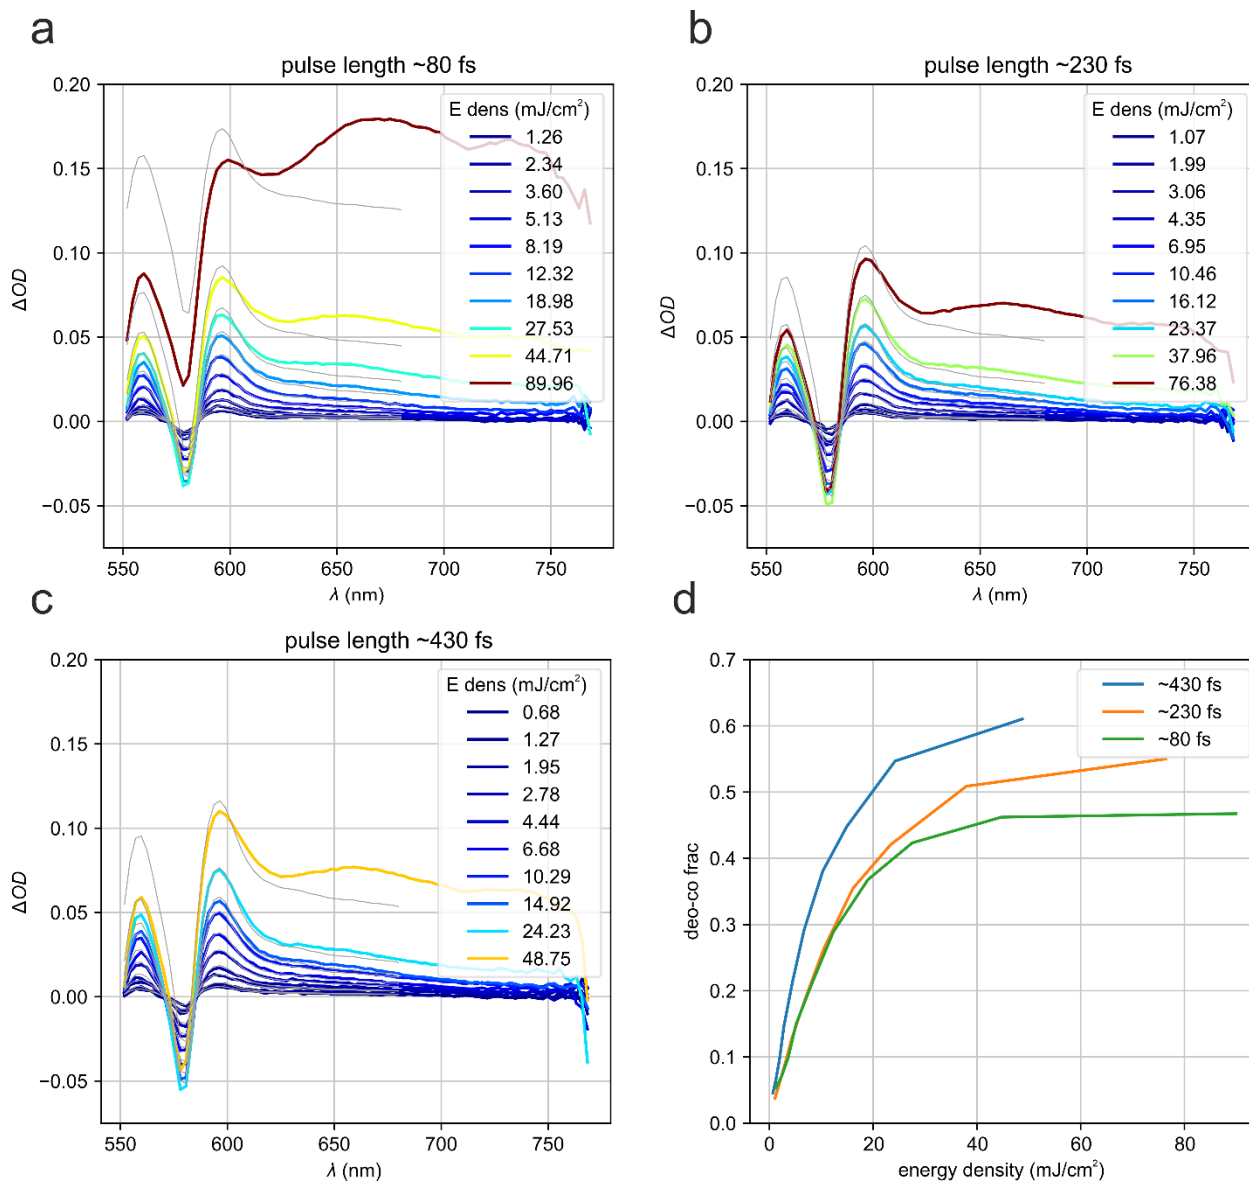

628

629

630 **Extended data Figure 1. Optical power titration.** Carboxymyoglobin solution (6 mM, 0.5 OD)  
631 was photoexcited using three different pump laser durations (~80 fs (a), 230 fs (b), 430 fs, (c))  
632 and different laser fluences, ranging from ~0.7  $mJ/cm^2$  to ~90  $mJ/cm^2$ . Spectra were recorded  
633 after a 10 ps delay following a 532 nm laser pump pulse. The curves are color-coded with respect  
634 to the energy density (fluence, same color scale for a-b). The difference spectra, light-dark, were  
635 fit against difference spectra of deoxy myoglobin (the final state of the photodissociation  
636 reaction) and carboxymyoglobin (deoxyMb-MbCO + const. offset). The thin lines are the fits  
637 that were used to estimate the photolysis fraction shown in (d). At high laser intensity the spectra  
638 change shape and an additional peak appears around 650 nm with a lifetime of a few ps (data not  
639 shown). The longer pulses seem to yield a higher fraction of photoproduct. The plot shown in (d)  
640 allows identification of the linear photoexcitation regime; it is  $\leq 10 mJ/cm^2$ .

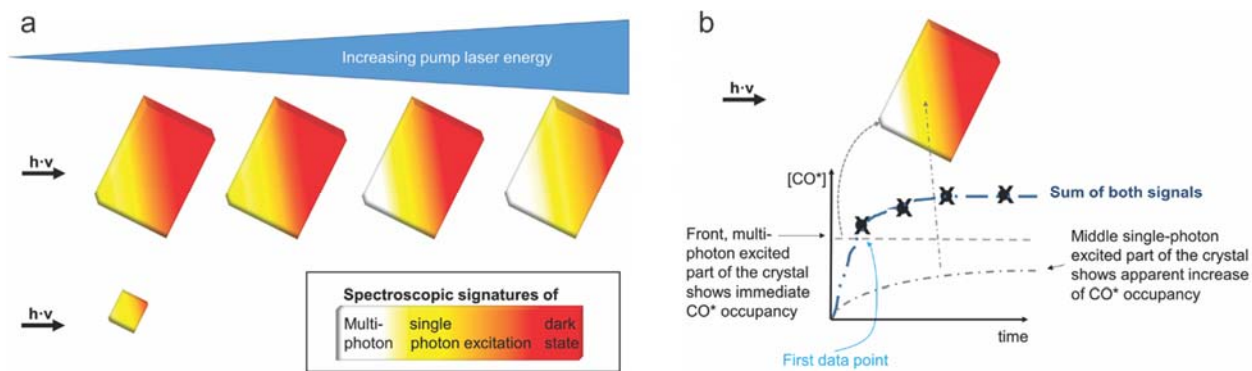

641

642

643

644 **Extended Data Fig. 2. Crystal size, laser fluence and light-induced difference (light minus**

645 **dark) signal are entangled quantities.** a) Low intensity laser light, such as required for

646 excitation in the linear excitation regime, cannot transverse crystals that have a dimension that

647 exceeds the  $1/e$  laser penetration depth. When this dimension is parallel to the laser beam, a

648 significant fraction of the crystal volume cannot be photoexcited and a large pedestal of dark

649 molecules remains (red), resulting in small light-dark differences. To increase the signal, the

650 laser fluence is increased, which however results in multiphoton absorption at the front of the

651 crystal. The issue is much reduced for crystals that have thickness  $d < 1/e$  of the pump laser

652 penetration depth<sup>19</sup>.

653 b) The different photoexcitation conditions in relatively thick crystals at high laser fluence can

654 reflect onto the signal. For example, in the  $101 \text{ mJ/cm}^2$  fluence data the  $CO^*$  signal increases

655 strongly within the first time-delay, reflecting the very fast photodissociation upon multiphoton

656 excitation at the “front” of the crystal. The increase of  $CO^*$  with time is similar to the signal in

657 the  $5 \text{ mJ/cm}^2$  and  $23 \text{ mJ/cm}^2$  data and originates from “deeper” regions in the crystal that were

658 exposed to significantly lower fluence because of absorption by molecules in the “front”.

659

660

661

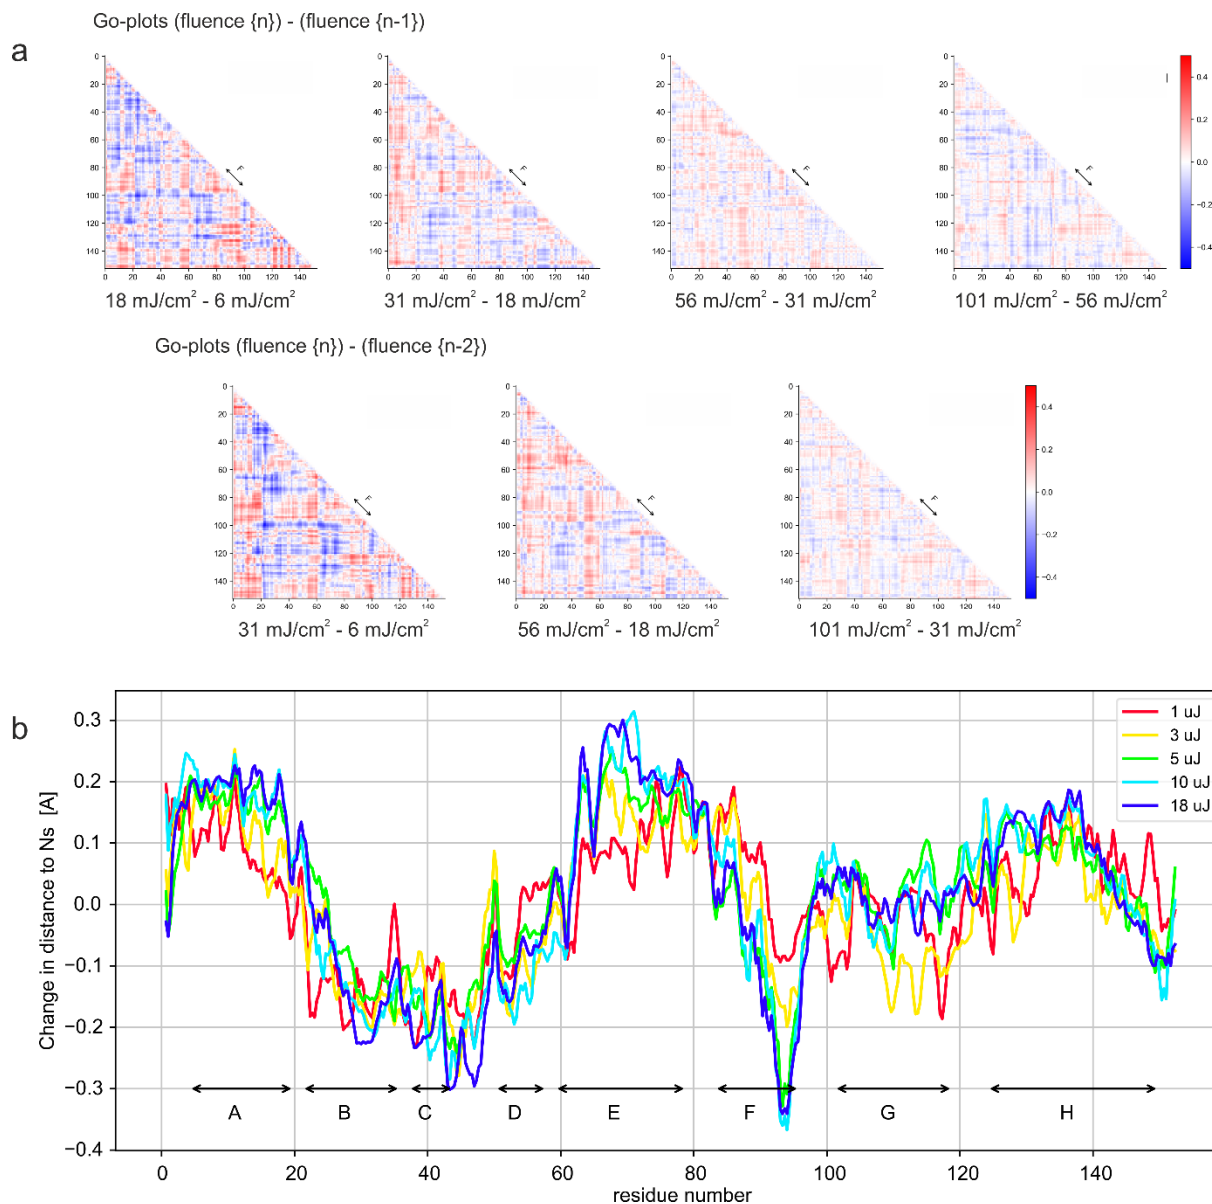

662  
663  
664  
665  
666  
667  
668  
669  
670  
671  
672  
673  
674  
675  
676

**Extended Data Fig. 3. Structural changes as a function of pump laser fluence at a 10 ps time delay.** To facilitate the identification of systematic differences between the structural changes observed upon photoexcitation at different laser fluences (see Fig. 1d), we calculated difference difference plots. The red and blue color-coding indicates that the atoms are further apart or closer together, respectively, than in the MbCO dark state structure. It appears that there are no systematic differences in correlated structural changes between pump laser energies. This differs from the findings described previously for a 3 ps time delay (see Fig. S13 in reference <sup>2</sup>) showing a more pronounced displacement for example of the F-helix at a pump laser energy of 20 μJ (~ 230 mJ/cm<sup>2</sup>; 1.5 TW/cm<sup>2</sup>) than at 6 μJ (~70 mJ/cm<sup>2</sup>; 450 GW/cm<sup>2</sup>). In contrast, Guallar-type plots<sup>29</sup>, showing the change in distance of backbone N, Ca, and C atoms to the heme nitrogens for each time delay, show a clear difference for the different laser fluences.

677

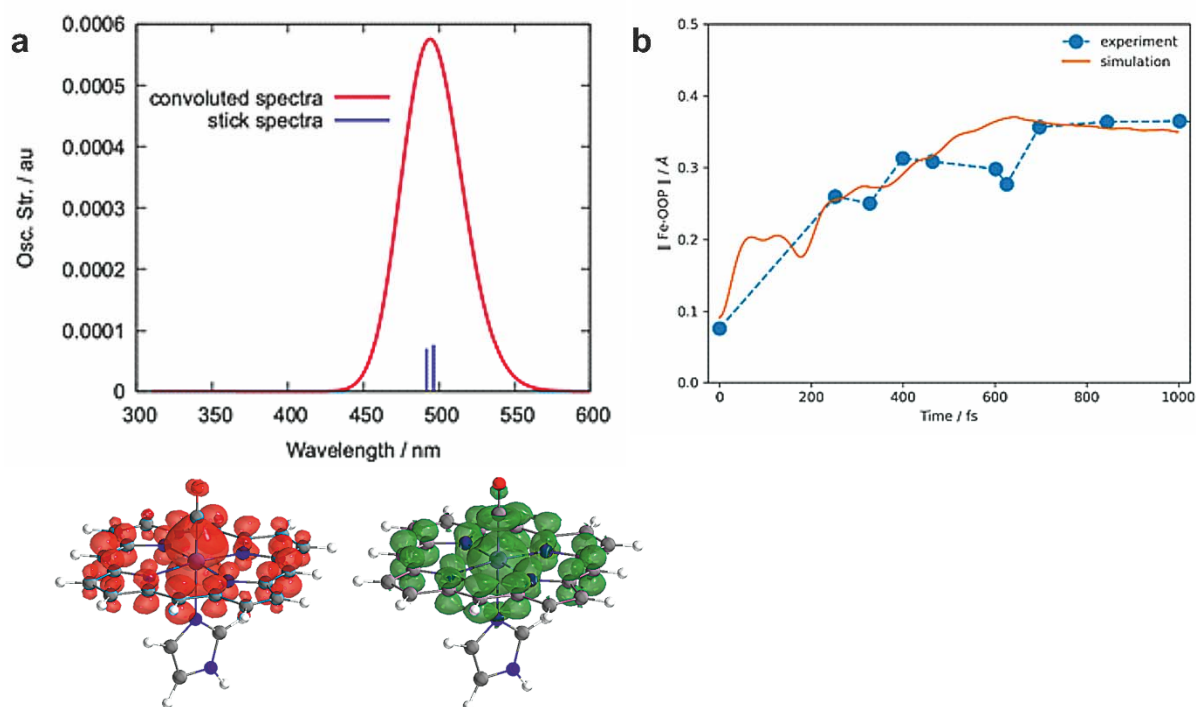

678

679 **Extended Data Fig. 4 Quantum Chemistry simulations.** a) The Q-band excited state  
680 absorption spectrum (top) can absorb to a high-energy singlet, in an excitation energy that is  
681 approximately two times that of the Q-band. This state corresponds to a mixed  $\pi \rightarrow \pi^*$  character  
682 of the heme and  $d_{xy} \rightarrow d_{z^2}/d_{yz} \rightarrow d_{z^2}$  character with respect to the ground state, as analyzed  
683 from an attachment (green) / detachment (red) density analysis, showing that it is dissociative  
684 with respect to the Fe-CO bond. b) Comparison of the FeOOP motion derived by QM/MM  
685 dynamics (see Supplementary Note 2 for details) and TR-SFX (single photon excitation, 5  
686 mJ/cm<sup>2</sup> data).

687

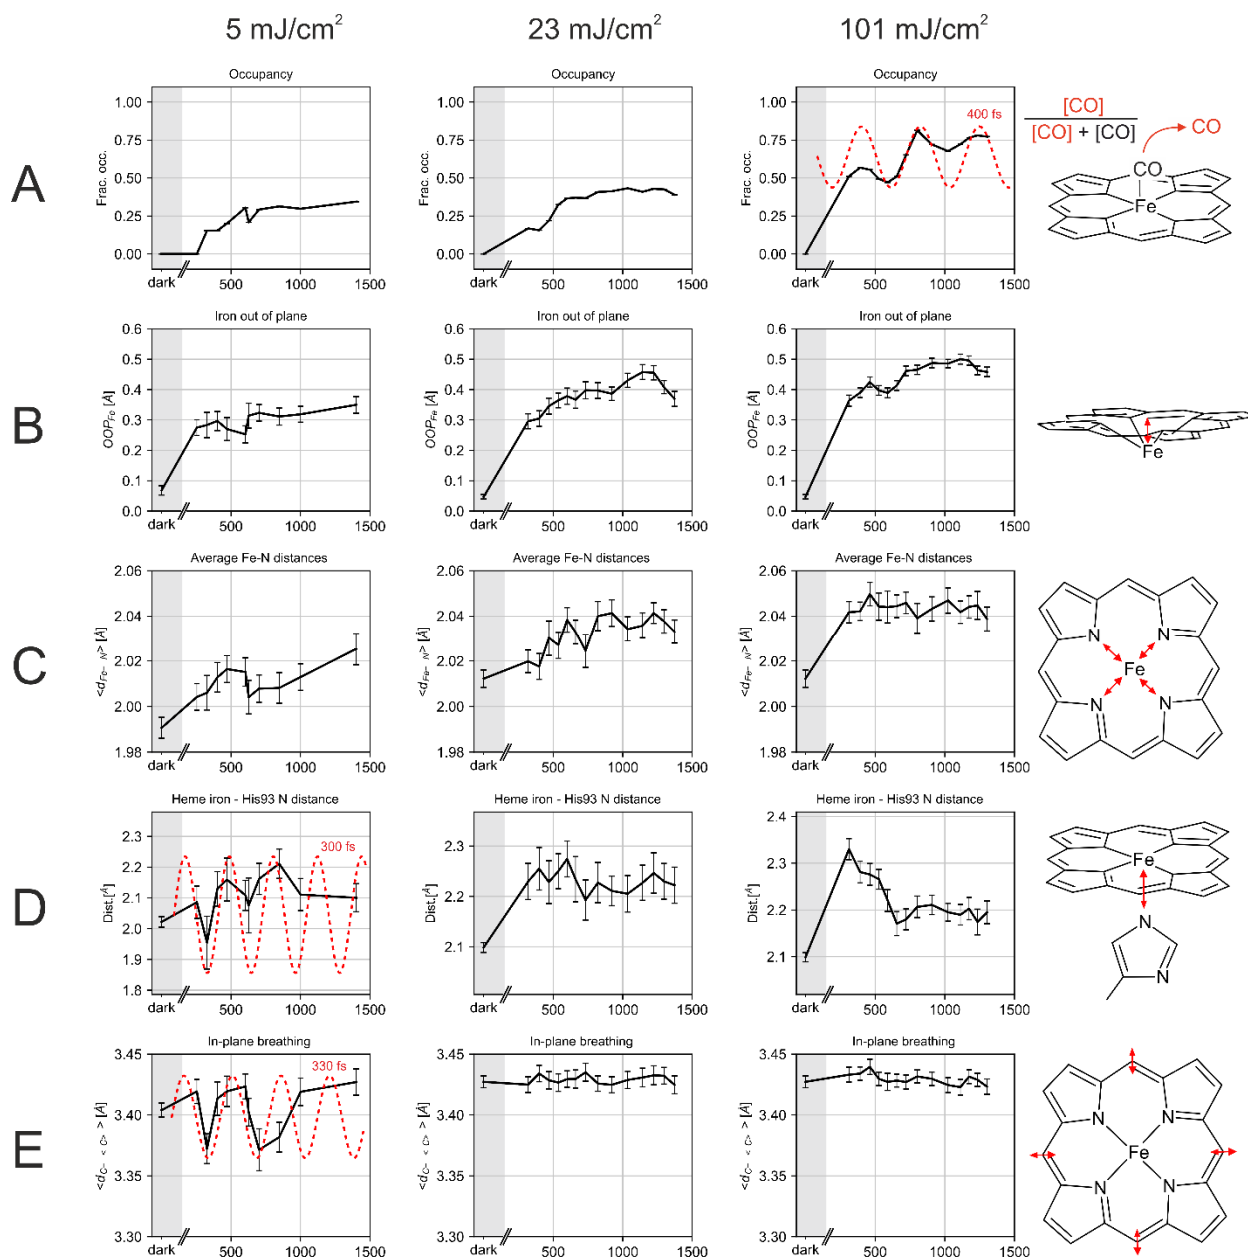

688

689 **Extended data Fig. 5. Heme structural dynamics.** The figure corresponds to Fig. 2 in the main  
 690 text but shows more details. a) Apparent CO\* occupancy, check Fig. 2 legend for the temporal  
 691 dependence of the 101 mJ/cm<sup>2</sup> data. b) iron-out-of-plane distance, c) average distance between  
 692 the iron atom and the porphyrin N atoms, d) distance between heme iron and proximal His93  
 693 NE2 atom, e) heme in-plane breathing (v7 mode), determined as the average distance of the  
 694 heme *meso* carbon atoms to the center of the heme. The oscillation periods are indicated by red  
 695 dashed lines. The coordinate uncertainties are indicated; they were determined using  
 696 bootstrapping resampling as described previously<sup>48,60</sup>, the error bars correspond to ±1 sigma.

697

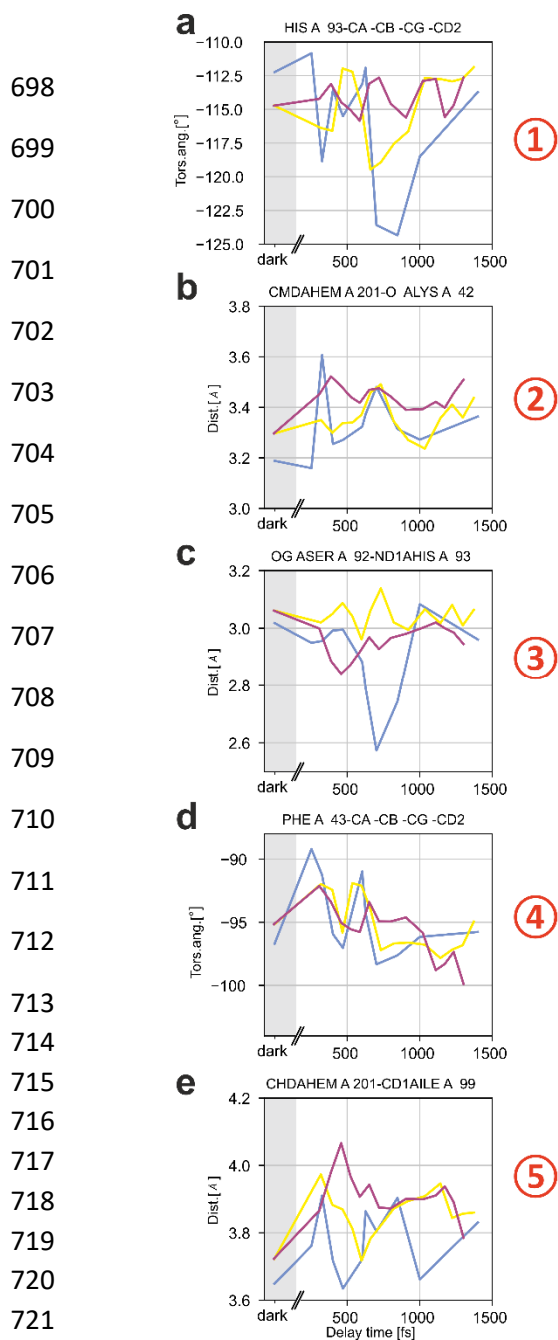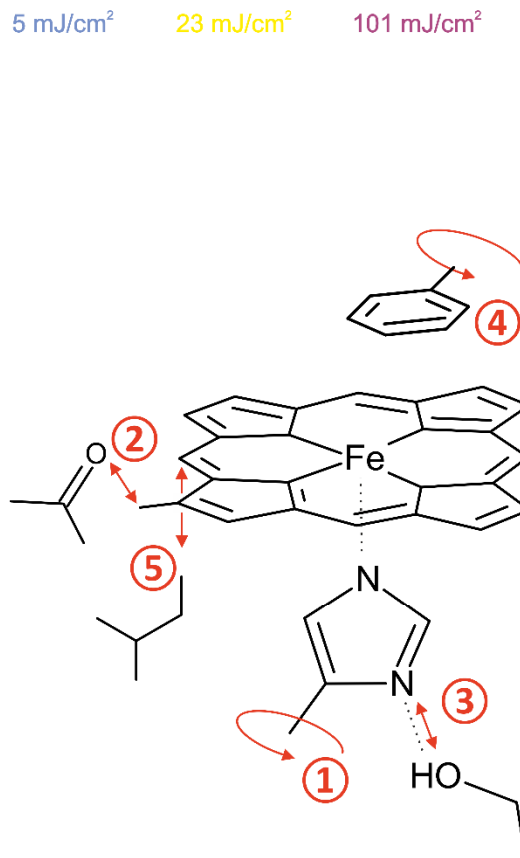

**Extended Data Fig. 6. Dynamics of heme surroundings depend strongly on fluence.** a)  $\chi^2$  torsion angle of the heme-coordinating His93. At higher fluences, much smaller movements are observed than at 5 mJ/cm<sup>2</sup>. At 101 mJ/cm<sup>2</sup> an oscillation is observed that is not apparent at lower fluences b) The distance between heme CMD atom and Lys42 backbone carbonyl O atom also shows different time evolutions with different fluences, with larger (and even oscillatory) motions at 5 mJ/cm<sup>2</sup> but smaller motions at higher fluences Similar fluence-dependent effects are observed in c) the length of the His93 ND1...Ser92 OG hydrogen bond, d) the Phe43  $\chi^2$  torsion angle, and e) the heme CHD-Ile99 CD1 distance. Error bars corresponding to  $\pm 1$  sigma and lines illustrating the oscillation periods are shown in Extended Data Fig. 7.

729

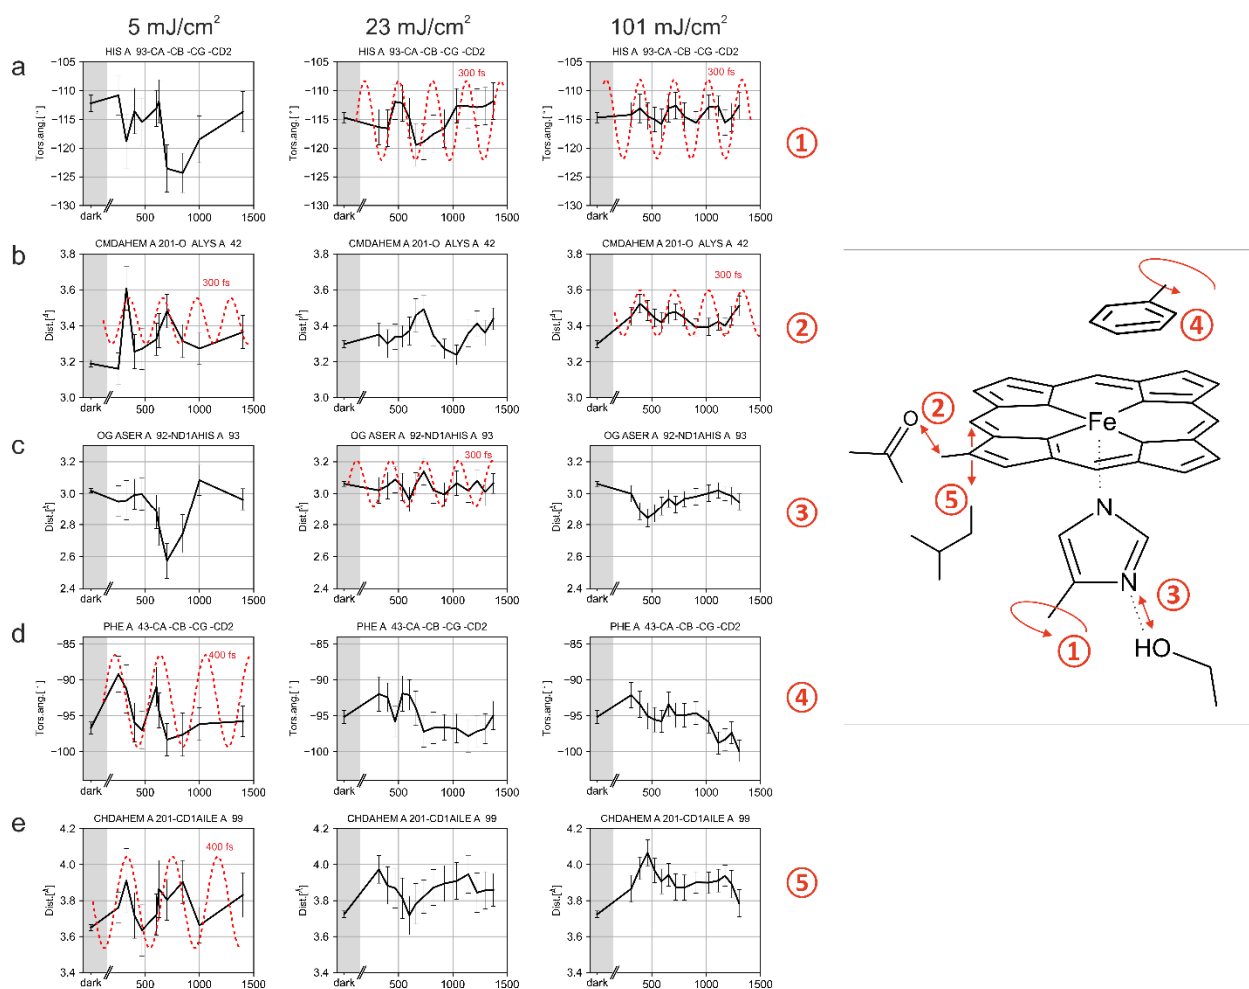

730

731

732 **Extended Data Fig. 7. Dynamics of heme surroundings.** a) His93  $\chi^2$  torsion angle, b) Distance  
 733 between heme CMD atom and Lys42 backbone carbonyl O atom, c) Length of the His93  
 734 ND1...Ser92 OG hydrogen bond. d) Phe43  $\chi^2$  torsion angle, e) heme CHD-Ile99 CD1 distance.  
 735 Red dashed lines illustrate oscillation periods. The coordinate uncertainties are indicated; they  
 736 were determined using bootstrapping resampling as described previously<sup>48,60</sup>, the error bars  
 737 correspond to  $\pm 1$  sigma.

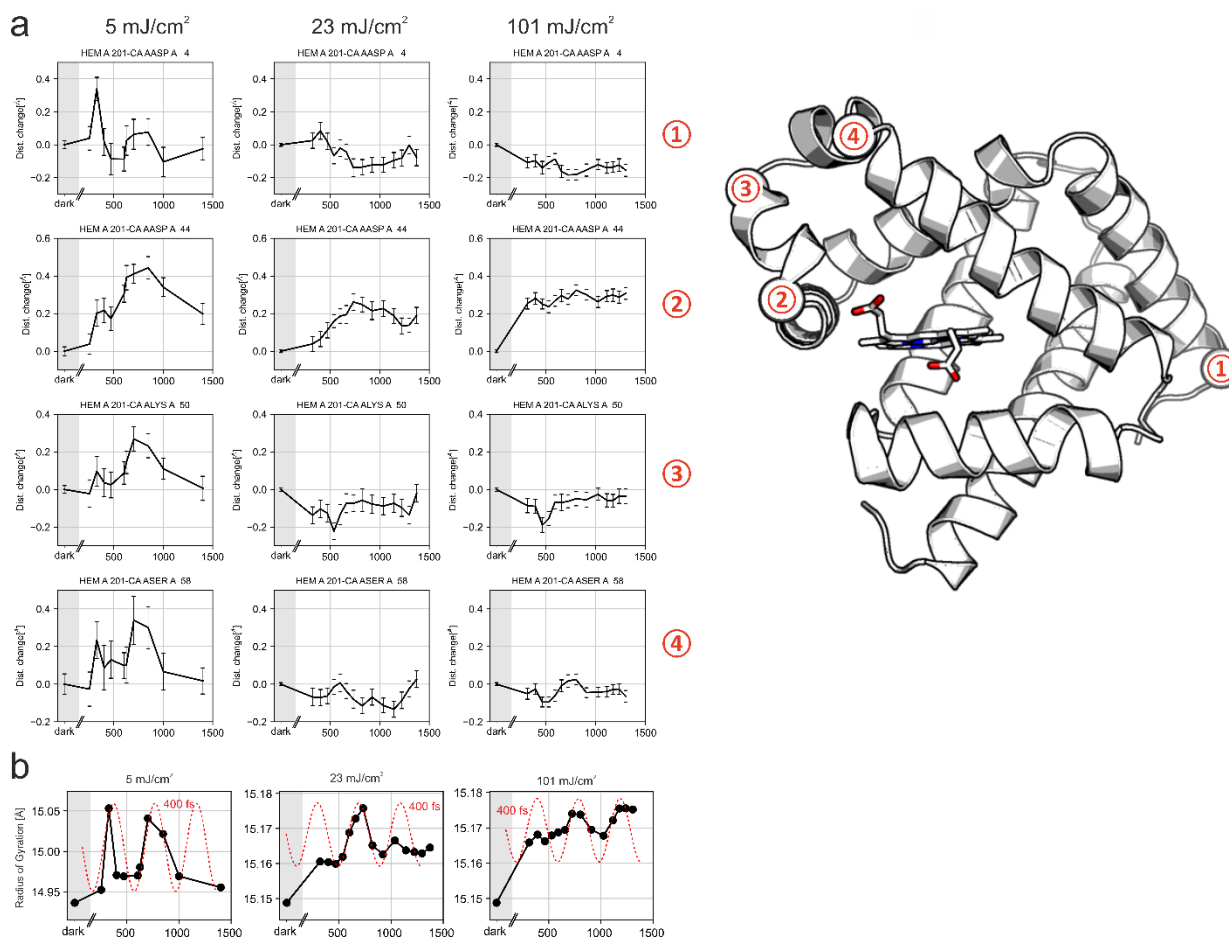

738

739

740

741 **Extended Data Fig. 8. C $\alpha$  atoms at the end of helices show an oscillatory modulation with**  
 742 **time at low photoexcitation fluence.** Left panel: 5 mJ/cm<sup>2</sup>, middle panel 23 mJ/cm<sup>2</sup>, right panel  
 743 101 mJ/cm<sup>2</sup>. The location of the residues, chosen to be at the beginning or end of helices, is  
 744 indicated. The F-helix (located below the heme, parallel to its plane) is shown in Fig. 3. The  
 745 oscillatory modulation of the structural changes is also apparent in the temporal evolution of the  
 746 radius of gyration Rg. Also in this case, the oscillation is strongest and most pronounced in the 5  
 747 mJ/cm<sup>2</sup> data, corresponding to photoexcitation in the linear regime. Red dashed lines illustrate  
 748 oscillatory periodicities. The coordinate uncertainties are indicated; they were determined using  
 749 bootstrapping resampling as described previously<sup>48,60</sup>, the error bars correspond to  $\pm 1$  sigma.

750

751

752

753



754 References

755

- 756 1. Barends, T.R.M., Stauch, B., Cherezov, V. & Schlichting, I. Serial Femtosecond Crystallography.  
757 *Nat. Rev. Meth. Primers* **2**, 59 (2022).
- 758 2. Barends, T.R. *et al.* Direct observation of ultrafast collective motions in CO myoglobin upon  
759 ligand dissociation. *Science* **350**, 445-50 (2015).
- 760 3. Pande, K. *et al.* Femtosecond structural dynamics drives the trans/cis isomerization in  
761 photoactive yellow protein. *Science* **352**, 725-9 (2016).
- 762 4. Coquelle, N. *et al.* Chromophore twisting in the excited state of a photoswitchable fluorescent  
763 protein captured by time-resolved serial femtosecond crystallography. *Nat. Chem.* **10**, 31-37  
764 (2018).
- 765 5. Nogly, P. *et al.* Retinal isomerization in bacteriorhodopsin captured by a femtosecond x-ray  
766 laser. *Science* **361**, eaat0094 (2018).
- 767 6. Nass Kovacs, G. *et al.* Three-dimensional view of ultrafast dynamics in photoexcited  
768 bacteriorhodopsin. *Nat. Commun.* **10**, 3177 (2019).
- 769 7. Claesson, E. *et al.* The primary structural photoresponse of phytochrome proteins captured by a  
770 femtosecond X-ray laser. *eLife* **9**, e53514 (2020).
- 771 8. Skopintsev, P. *et al.* Femtosecond-to-millisecond structural changes in a light-driven sodium  
772 pump. *Nature* **583**, 314-318 (2020).
- 773 9. Yun, J.H. *et al.* Early-stage dynamics of chloride ion-pumping rhodopsin revealed by a  
774 femtosecond X-ray laser. *Proc. Natl. Acad. Sci. U S A* **118**(2021).
- 775 10. Dods, R. *et al.* Ultrafast structural changes within a photosynthetic reaction centre. *Nature* **589**,  
776 310-314 (2021).
- 777 11. Mous, S. *et al.* Dynamics and mechanism of a light-driven chloride pump. *Science* **375**, 845-851  
778 (2022).
- 779 12. Maestre-Reyna, M. *et al.* Serial crystallography captures dynamic control of sequential electron  
780 and proton transfer events in a flavoenzyme. *Nat. Chem.* **14**, 677-+ (2022).
- 781 13. Gruhl, T. *et al.* Ultrafast structural changes direct the first molecular events of vision. *bioRxiv*  
782 *2022.10.14.511948* (2022).
- 783 14. Wranik, M. *et al.* Molecular snapshots of drug release from tubulin over eleven orders of  
784 magnitude in time. *bioRxiv 2022.02.17.480857* (2022).
- 785 15. Falahati, K., Tamura, H., Burghardt, I. & Huix-Rotllant, M. Ultrafast carbon monoxide photolysis  
786 and heme spin-crossover in myoglobin via nonadiabatic quantum dynamics. *Nat Commun* **9**,  
787 4502 (2018).
- 788 16. Brändén, G. & Neutze, R. Advances and challenges in time-resolved macromolecular  
789 crystallography. *Science* **373**, eaba0954 (2021).
- 790 17. Sorigue, D. *et al.* Mechanism and dynamics of fatty acid photodecarboxylase. *Science* **372**,  
791 eabd5687 (2021).
- 792 18. Miller, R.J.D., Pare-Labrosse, O., Sarracini, A. & Besaw, J.E. Three-dimensional view of ultrafast  
793 dynamics in photoexcited bacteriorhodopsin in the multiphoton regime and biological  
794 relevance. *Nat. Commun.* **11**, 1240 (2020).
- 795 19. Grünbein, M.L. *et al.* Illumination guidelines for ultrafast pump-probe experiments by serial  
796 femtosecond crystallography. *Nat. Methods* **17**, 681-684 (2020).
- 797 20. Genberg, L., Richard, L., Mclendon, G. & Miller, R.J.D. Direct Observation of Global Protein  
798 Motion in Hemoglobin and Myoglobin on Picosecond Time Scales. *Science* **251**, 1051-1054  
799 (1991).

- 800 21. Goodno, G.D., Astinov, V. & Miller, R.J.D. Femtosecond heterodyne-detected four-wave-mixing  
801 studies of deterministic protein motions. 2. Protein response. *J. Phys. Chem. A* **103**, 10630-  
802 10643 (1999).
- 803 22. Carrillo, M. *et al.* High-resolution crystal structures of transient intermediates in the  
804 phytochrome photocycle. *Structure* **29**, 743-754 e4 (2021).
- 805 23. Hadjidemetriou, K. *et al.* Time-resolved serial femtosecond crystallography on fatty-acid  
806 photodecarboxylase: lessons learned. *Acta Cryst.* **D78**, 1131-1142 (2022).
- 807 24. Franzen, S., Kiger, L., Poyart, C. & Martin, J.L. Heme photolysis occurs by ultrafast excited state  
808 metal-to-ring charge transfer. *Biophys J* **80**, 2372-85 (2001).
- 809 25. Levantino, M. *et al.* Observing heme doming in myoglobin with femtosecond X-ray absorption  
810 spectroscopy. *Struct. Dyn.* **2**, 041713 (2015).
- 811 26. Mizutani, Y. & Kitagawa, T. Ultrafast dynamics of myoglobin probed by time-resolved resonance  
812 Raman spectroscopy. *Chem Rec* **1**, 258-75 (2001).
- 813 27. Li, X.Y., Czernuszewicz, R.S., Kincaid, J.R., Stein, P. & Spiro, T.G. Consistent Porphyrin Force-Field  
814 .2. Nickel Octaethylporphyrin Skeletal and Substituent Mode Assignments from N-15, Meso-D4,  
815 and Methylene-D16 Raman and Infrared Isotope Shifts. *J. Phys. Chem.* **94**, 47-61 (1990).
- 816 28. Shelby, M.L. *et al.* Interplays of electron and nuclear motions along CO dissociation trajectory in  
817 myoglobin revealed by ultrafast X-rays and quantum dynamics calculations. *Proc Natl Acad Sci U*  
818 *S A* **118**, e2018966118 (2021).
- 819 29. Guallar, V., Jarzecki, A.A., Friesner, R.A. & Spiro, T.G. Modeling of ligation-induced helix/loop  
820 displacements in myoglobin: toward an understanding of hemoglobin allostery. *J Am Chem Soc*  
821 **128**, 5427-35 (2006).
- 822 30. Kenkre, V.M., Tokmakoff, A. & Fayer, M.D. Theory of Vibrational-Relaxation of Polyatomic-  
823 Molecules in Liquids. *J. Chem. Phys.* **101**, 10618-10629 (1994).
- 824 31. Rosca, F. *et al.* Investigations of anharmonic low-frequency oscillations in heme proteins. *Journal*  
825 *of Physical Chemistry A* **106**, 3540-3552 (2002).
- 826 32. Lian, T.Q., Locke, B., Kholodenko, Y. & Hochstrasser, R.M. Energy-Flow from Solute to Solvent  
827 Probed by Femtosecond Ir Spectroscopy - Malachite Green and Heme Protein Solutions. *J. Phys.*  
828 *Chem.* **98**, 11648-11656 (1994).
- 829 33. Arnlund, D. *et al.* Visualizing a protein quake with time-resolved X-ray scattering at a free-  
830 electron laser. *Nat Methods* **11**, 923-6 (2014).
- 831 34. Hughes, J. Phytochrome photoreceptors: rapid response. *eLife* **9**, e57105 (2021).
- 832 35. Shoeman, R.L., Hartmann, E. & Schlichting, I. Growing and making nano- and microcrystals *Nat*  
833 *Protoc in press*(2022).
- 834 36. Kedenburg, S., Vieweg, M., Gissibl, T. & Giessen, H. Linear refractive index and absorption  
835 measurements of nonlinear optical liquids in the visible and near-infrared spectral region. *Opt.*  
836 *Mat. Express* **2**, 1588-1611 (2012).
- 837 37. Milne, C.J. *et al.* Opportunities for Chemistry at the SwissFEL X-ray Free Electron Laser. *Chimia*  
838 **71**, 299-307 (2017).
- 839 38. Weierstall, U., Spence, J.C. & Doak, R.B. Injector for scattering measurements on fully solvated  
840 biospecies. *Rev.Sci.Instrum.* **83**, 035108 (2012).
- 841 39. White, T.A. *et al.* CrystFEL: a software suite for snapshot serial crystallography. *J. Appl.*  
842 *Crystallogr.* **45**, 335-341 (2012).
- 843 40. Gevorkov, Y. *et al.* XGANDALF - extended gradient descent algorithm for lattice finding. *Acta*  
844 *Crystallogr. A* **75**, 694-704 (2019).
- 845 41. Duisenberg, A.J.M. INDEXING IN SINGLE-CRYSTAL DIFFRACTOMETRY WITH AN OBSTINATE LIST  
846 OF REFLECTIONS. *Journal of applied crystallography* **25**, 92-96 (1992).

- 847 42. Kabsch, W. XDS. *Acta crystallographica. Section D, Biological crystallography* **66**, 125–132  
848 (2010).
- 849 43. Leslie, A.G.W. The integration of macromolecular diffraction data. *Acta Crystallographica*  
850 *Section D-Biological Crystallography* **62**, 48-57 (2006).
- 851 44. Kirian, R.A. *et al.* Femtosecond protein nanocrystallography—data analysis methods. *Optics*  
852 *Express* **18**, 5713-5723 (2010).
- 853 45. Kirian, R.A. *et al.* Structure-factor analysis of femtosecond microdiffraction patterns from  
854 protein nanocrystals. *Acta Crystallogr. A* **67**, 131-40 (2011).
- 855 46. Genick, U.K. *et al.* Structure of a protein photocycle intermediate by millisecond time-resolved  
856 crystallography. *Science* **275**, 1471-5 (1997).
- 857 47. Genick, U.K. Structure-factor extrapolation using the scalar approximation: theory, applications  
858 and limitations. *Acta Crystallogr. D* **63**, 1029-1041 (2007).
- 859 48. Gorel, A., Schlichting, I. & Barends, T.R.M. Discerning best practices in XFEL-based biological  
860 crystallography - standards for nonstandard experiments. *IUCrJ* **8**, 532-543 (2021).
- 861 49. Howell, L. & Smith, D. Normal Probability Analysis. *Journal of applied crystallography* **25**, 81-86  
862 (1992).
- 863 50. 4, C.C.P.N. The CCP4 suite: programs for protein crystallography. *Acta crystallographica. Section*  
864 *D, Biological crystallography* **50**, 760–763 (1994).
- 865 51. Adams, P.D. *et al.* PHENIX: a comprehensive Python-based system for macromolecular structure  
866 solution. *Acta Crystallogr D* **66**, 213-21 (2010).
- 867 52. Karplus, P.A. & Diederichs, K. Linking Crystallographic Model and Data Quality. *Science* **336**,  
868 1030-1033 (2012).
- 869 53. De Zitter, E., Coquelle, N., Oeser, P., Barends, T.R.M. & Colletier, J.P. Xtrapol8 enables automatic  
870 elucidation of low-occupancy intermediate-states in crystallographic studies. *Communications*  
871 *Biology* **5**(2022).
- 872 54. Ursby, T. & Bourgeois, D. Improved estimation of structure-factor difference amplitudes from  
873 poorly accurate data. *Acta Crystallographica a-Foundation and Advances* **53**, 564-575 (1997).
- 874 55. Emsley, P. & Cowtan, K. Coot: model-building tools for molecular graphics. *Acta Crystallogr D* **60**,  
875 2126-2132 (2004).
- 876 56. Emsley, P., Lohkamp, B., Scott, W.G. & Cowtan, K. Features and development of Coot. *Acta*  
877 *Crystallogr D* **66**, 486-501 (2010).
- 878 57. DeLano, W.L. PyMol. <http://www.pymol.org> (2002).
- 879 58. Harris, C.R. *et al.* Array programming with NumPy. *Nature* **585**, 357-362 (2020).
- 880 59. Virtanen, P. *et al.* SciPy 1.0: fundamental algorithms for scientific computing in Python (vol 33,  
881 pg 219, 2020). *Nat Methods* **17**, 352-352 (2020).
- 882 60. Grünbein, M.L. *et al.* Effect of X-ray free-electron laser-induced shockwaves on haemoglobin  
883 microcrystals delivered in a liquid jet. *Nat. Commun.* **12**, 1672 (2021).
- 884 61. Galvan, I.F. *et al.* OpenMolcas: From Source Code to Insight. *J. Chem Theory Computation* **15**,  
885 5925-5964 (2019).
- 886 62. Aquilante, F. *et al.* Modern quantum chemistry with [Open]Molcas. *J. Chem. Phys.* **152**(2020).
- 887 63. Chu, K. *et al.* Structure of a ligand-binding intermediate in wild-type carbonmonoxy myoglobin.  
888 *Nature* **403**, 921-923 (2000).
- 889 64. Rackers, J.A. *et al.* Tinker 8: Software Tools for Molecular Design. *J. Chem Theory Computation*  
890 **14**, 5273-5289 (2018).
- 891 65. Barca, G.M.J. *et al.* Recent developments in the general atomic and molecular electronic  
892 structure system. *J. Chem. Phys.* **152**(2020).
- 893 66. Huang, J. *et al.* CHARMM36m: an improved force field for folded and intrinsically disordered  
894 proteins. *Nat Methods* **14**, 71-73 (2017).

- 895 67. Seno, Y. & Go, N. Deoxymyoglobin studied by the conformational normal mode analysis. I.  
896 Dynamics of globin and the heme-globin interaction. *J. Mol. Biol.* **216**, 95-109 (1990).  
897
